# Supplementary material for: Specialization of small non-conjugative plasmids in Escherichia coli according to their family types
Source: PubMed Central journal article supplement — Microb Genom. 2019 Aug 7;5(9):e000281. doi: 10.1099/mgen.0.000281 (PMC6807383; doi:10.1099/mgen.0.000281), 2019-08-07
Supplement: mgen-5-281-s001.pdf [file mgen-5-281-s001.pdf]

**Table S1. Characteristics of the 30 *E. coli* MOB and RelN<sub>RNA</sub> plasmids of our collection and their host strains**

| Plasmid ID <sup>1</sup>                                  | Transfer type <sup>2</sup> | Size bp | Mobilization gene type   | Rop <sup>3</sup> | Resistance genes on plasmid    | Colicin type                | TA system    | Plasmid accession no | Host strain ID | Origin         | Year of isolation | Strain phylogroup <sup>4</sup> | Strain cMLST IP <sup>5</sup> |     |
|----------------------------------------------------------|----------------------------|---------|--------------------------|------------------|--------------------------------|-----------------------------|--------------|----------------------|----------------|----------------|-------------------|--------------------------------|------------------------------|-----|
| <b>MOBrep<sub>B1</sub> plasmid family, RGT Qu</b>        |                            |         |                          |                  |                                |                             |              |                      |                |                |                   |                                |                              |     |
| RCS76_pIII♦                                              | C/Incl1                    | 4,054   | mobA1                    | nc               |                                |                             |              | LT985285             | 13948          | France         | 2004              | C                              | 7                            |     |
| RCS35_pl                                                 | E                          | 4,087   | mobA1                    | nc               |                                |                             |              | LT985232             | 565            | France         | 2002              | B1                             | 87                           |     |
| RCS49_pII                                                | C/Incl1                    | 4,074   | mobA1                    | nc               |                                |                             |              | LT985255             | 580            | France         | 2002              | B2                             | 9                            |     |
| RCS32                                                    | E                          | 7,050   | mobA1                    | nc               | <i>bla</i> <sub>CTX-M-15</sub> |                             |              | LT985240             | 659            | France         | 2001              | B2                             | 43                           |     |
| <b>MOBrep<sub>B2</sub> plasmid family</b>                |                            |         |                          |                  |                                |                             |              |                      |                |                |                   |                                |                              |     |
| RCS90_pII                                                | C/IncB/O                   | 11,964  | <i>MobA2</i>             | nc               | <i>strA/B</i>                  |                             |              | LT985301             | ECOR 24        | Sweden         | 70-80s            | A                              | 176                          |     |
| <b>MOB<sub>RNA</sub> plasmid type1 family, RGT P5-1</b>  |                            |         |                          |                  |                                |                             |              |                      |                |                |                   |                                |                              |     |
| RCS83_pIII                                               | P                          | 5,912   | <i>mbe</i> ABC DE type 1 | +                |                                |                             |              | LT985292             | ECOR 10        | USA            | 70-80s            | A                              | 2                            |     |
| RCS93_pIII                                               | P                          | 5,631   | <i>mbe</i> ABCDE type 1  | +                |                                |                             |              | LT985311             | CIP106223      | United Kingdom | 1932              | D                              | IC                           |     |
| RCS37_pl                                                 | C/Incl1                    | 10,551  | <i>mbe</i> ABCDE type 1  | +                | <i>bla</i> <sub>TEM-1</sub>    |                             |              | LT985230             | 730            | France         | 2002              | F                              | IC                           |     |
| RCS76_pII♦                                               | C/Incl1                    | 6,649   | <i>mbe</i> ABCDE type 1  | +                |                                | E1                          |              | LT985284             | 13948          | France         | 2004              | C                              | 7                            |     |
| RCS33_pII                                                | C/Incl1                    | 6,647   | <i>mbe</i> ABCDE type 1  | +                |                                | E1                          |              | LT985237             | 641            | France         | 2002              | B1                             | 739                          |     |
| RCS82_pII                                                | P                          | 23,526  | <i>mbe</i> ABCDE type 1  | +                |                                | E1                          | CcdAB        | LT985303             | ECOR 39        | Sweden         | 70-80s            | F                              | 254                          |     |
| <b>MOB<sub>RNA</sub> plasmid type 2 family</b>           |                            |         |                          |                  |                                |                             |              |                      |                |                |                   |                                |                              |     |
| RCS55_pII                                                | C/Incl/M                   | 6,859   | <i>mbe</i> ABCDE type 2  | +                |                                | S4                          |              | LT985386             | 694            | France         | 2001              | A                              | 2                            |     |
| RCS74_pII♦                                               | C Incl1                    | 7,133   | <i>mbe</i> ABCDE type 2  | +                |                                | S4                          |              | LT985282             | 13942          | France         | 2004              | NA                             | NA                           |     |
| <b>MOB<sub>RNA</sub> plasmid type 3 family, RGT P5-2</b> |                            |         |                          |                  |                                |                             |              |                      |                |                |                   |                                |                              |     |
| RCS48_pIII                                               | C/Incl1                    | 4,772   | <i>mob</i> ABC           | -                |                                |                             |              | LT985246             | 720            | France         | 2003              | B2                             | 9                            |     |
| RCS49_pIII                                               | C/Incl1                    | 15,843  | <i>mob</i> ABC           | -                | <i>bla</i> <sub>SHV-12</sub>   | <i>bla</i> <sub>TEM-1</sub> |              | LT985254             | 580            | France         | 2002              | B2                             | 9                            |     |
| RCS91                                                    | E                          | 9,89    | <i>mob</i> ABC           | -                |                                | <i>tetA(A)</i>              |              | LT985299             | ECOR 6         | USA            | 70-80s            | A                              | IC                           |     |
| <b>MOB<sub>RNA</sub> plasmid type 4 family, RGT C11</b>  |                            |         |                          |                  |                                |                             |              |                      |                |                |                   |                                |                              |     |
| RCS12TR533_pl                                            | E                          | 14,248  | <i>mob</i> BC            | +                | <i>bla</i> <sub>TEM-3</sub>    |                             | cloacin      | ParE/B               | LT985216       | 533            | France            | 1999                           | B2                           | 33  |
| RCS49_pIV                                                | C/Incl1                    | 20,798  | <i>mob</i> BC            | +                | <i>bla</i> <sub>SHV-12</sub>   | <i>bla</i> <sub>TEM-1</sub> | cloacin      | ParE/B,LsoA/B        | LT985257       | 580            | France            | 2002                           | B2                           | 9   |
| <b>MOB<sub>RNA</sub> plasmid type 5 family, RGT P5-3</b> |                            |         |                          |                  |                                |                             |              |                      |                |                |                   |                                |                              |     |
| RCS48_pII                                                | C/Incl1                    | 19,831  | <i>mob</i>               | +                | <i>bla</i> <sub>SHV-12</sub>   | <i>bla</i> <sub>TEM-1</sub> | <i>Δmer1</i> | LsoA/B               | LT985247       | 720            | France            | 2003                           | B2                           | 9   |
| RCS35_pII                                                | E                          | 14,365  | <i>mob</i>               | +                | <i>bla</i> <sub>SHV-12</sub>   | <i>bla</i> <sub>TEM-1</sub> |              | LsoA/B               | LT985233       | 565            | France            | 2002                           | B1                           | 87  |
| RCS93_pIV                                                | P                          | 4,913   | <i>mob</i>               | +                |                                |                             | E1           | -                    | LT985308       | CIP106223      | United Kingdom    | 1932                           | D                            | IC  |
| RCS64_pl                                                 | C/Incl1                    | 3,002   | <i>mob</i>               | +                |                                |                             |              | parE/B               | LT985294       | 650            | France            | 2002                           | D                            | 740 |
| <b>RelN<sub>RNA</sub> plasmids type 1 family</b>         |                            |         |                          |                  |                                |                             |              |                      |                |                |                   |                                |                              |     |
| RCS87♦                                                   | E                          | 6,047   |                          | -                |                                | <i>sul2</i>                 |              | MazE                 | LT985298       | ECOR 18        | USA               | 70-80s                         | A                            | 132 |
| RCS86_pl                                                 | E                          | 6,069   |                          | -                |                                | <i>sul2</i>                 |              | MazE                 | LT985307       | ECOR 4         | USA               | 70-80s                         | A                            | 188 |
| RCS98♦                                                   | E                          | 6,200   |                          | -                |                                | <i>strA/B</i>               | <i>sul2</i>  | MazE                 | LT985316       | ECOR 17        | Indonesia         | 70-80s                         | A                            | 169 |
| RCS92_pl♦                                                | E                          | 6,222   |                          | -                |                                | <i>strA/B</i>               | <i>sul2</i>  | MazE                 | LT985314       | ECOR 25        | USA               | 70-80s                         | A                            | 177 |
| RCS63                                                    | E                          | 22,308  |                          | -                | <i>bla</i> <sub>CTX-M-14</sub> | <i>strA/B</i>               | <i>sul2</i>  | MazE                 | LT985269       | 631            | France            | 2002                           | A                            | 2   |
| <b>RelN<sub>RNA</sub> plasmid type 2 family</b>          |                            |         |                          |                  |                                |                             |              |                      |                |                |                   |                                |                              |     |
| RCS92_pIII♦                                              | E                          | 3,174   |                          | +                |                                |                             |              |                      | LT985312       | ECOR 25        | USA               | 70-80s                         | A                            | 177 |
| RCS83_pII                                                | P                          | 2,999   |                          | +                |                                |                             |              | HigAB                | LT985291       | ECOR 10        | USA               | 70-80s                         | A                            | 2   |
| <b>RelN<sub>RNA</sub> plasmid type 3 family</b>          |                            |         |                          |                  |                                |                             |              |                      |                |                |                   |                                |                              |     |
| RCS83_pl                                                 | P                          | 4,074   |                          | +                |                                |                             |              | MazE                 | LT985290       | ECOR 10        | USA               | 70-80s                         | A                            | 2   |

<sup>1</sup>RGT, Relaxase Gene Type (Compain et al, 2014); ♦, plasmids isolated from animal: strains 13948 and 13942, *Bos taurus*; ECOR 17, *Sus scrofa domestica*; ECOR 18, *Macaca nigra*; ECOR 25, *Canis lupus familiaris*
<sup>2</sup>E, electroporation; C/, conjugation followed by conjugative plasmid Inc types; P, plasmidome

<sup>3</sup>Rop, repressor of primer; nc, not concerned; +, presence;- , absence

<sup>4</sup>NA, non-available

<sup>5</sup>IC, incomplete sequence type

**Table S2. Description of backbone contents of the 10 plasmid families based on the 30 plasmids of our collection**

| Gene contents of the plasmid backbones according to the family type |                   |                          |                               |                                                     |             |
|---------------------------------------------------------------------|-------------------|--------------------------|-------------------------------|-----------------------------------------------------|-------------|
| Family type                                                         | Replication gene  | Mobilisation gene system | Presence of a <i>rop</i> gene | No of genes coding for proteins of unknown function | Other genes |
| MOBrep <sub>B1</sub> plasmid family, RGT Qu                         | rep <sub>B1</sub> | <i>mobA1</i>             | NC                            | 1                                                   | -           |
| MOBrep <sub>B2</sub> plasmid family                                 | rep <sub>B2</sub> | <i>mobA2</i>             | NC                            | 1                                                   | -           |
| MOB <sub>RNA</sub> plasmid type1 family, RGT P5-1                   | NC                | <i>mbeABCDE</i> type 1   | +                             | 0                                                   | -           |
| MOB <sub>RNA</sub> plasmid type 2 family                            | NC                | <i>mbeABCDE</i> type 2   | +                             | 0                                                   | -           |
| MOB <sub>RNA</sub> plasmid type 3 family, RGT P5-2                  | NC                | <i>mobABC</i>            | -                             | 1                                                   | -           |
| MOB <sub>RNA</sub> plasmid type 4 family, RGT C11                   | NC                | <i>mobBC</i>             | +                             | 0                                                   | -           |
| MOB <sub>RNA</sub> plasmid type 5 family, RGT P5-3                  | NC                | <i>mob</i>               | +                             | 0                                                   | -           |
| Rel <sub>RNA</sub> plasmids type 1 family                           | NC                | none                     | -                             | 4                                                   | <i>mazE</i> |
| Rel <sub>RNA</sub> plasmid type 2 family                            | NC                | none                     | +                             | 2                                                   | -           |
| Rel <sub>RNA</sub> plasmid type 3 family                            | NC                | none                     | +                             | 2                                                   | -           |

\*NC, not concerned

\*\*+, presence; -, absence

Table S3. Characteristics of the MOB<sub>repB1</sub> plasmids

| No | Plasmid ID           | Accession no               | Co-integration | Plasmid size bp | Colicin operon type | Toxin/antitoxin system | Restriction/methylation system | antibiotic resistance gene     | other genes | Bacterial host ID                                                | Geographic origin |
|----|----------------------|----------------------------|----------------|-----------------|---------------------|------------------------|--------------------------------|--------------------------------|-------------|------------------------------------------------------------------|-------------------|
| 1  | pIGWZ12              | <a href="#">DQ311641.1</a> |                | 4 072           |                     |                        |                                |                                |             | <i>Escherichia coli</i> CZD1527                                  | Poland            |
| 2  | pSF-468-4            | <a href="#">CP012629.1</a> |                | 4 072           |                     |                        |                                |                                |             | <i>Escherichia coli</i> strain SF-468                            | USA               |
| 3  | pEC732_4             | <a href="#">CP015142.1</a> |                | 4 072           |                     |                        |                                |                                |             | <i>Escherichia coli</i> strain Ecol_732                          | Thailand          |
| 4  | RCS32                | <a href="#">LT985240.1</a> |                | 7 050           |                     |                        |                                | <i>bla</i> <sub>CTX-M-15</sub> |             | <i>Escherichia coli</i> strain 659                               | France            |
| 5  | pEC867_3             | <a href="#">CP018980.1</a> |                | 4 074           |                     |                        |                                |                                |             | <i>Escherichia coli</i> strain Ecol_867                          | Canada            |
| 6  | VNB151-sc-2315230 p2 | <a href="#">LT795116.1</a> |                | 4 239           |                     |                        |                                |                                |             | <i>Salmonella enterica</i> serovar Typhimurium VNB151-sc-2315230 | United Kingdom    |
| 7  | pE35BA_1             | <a href="#">KT693145.1</a> |                | 4 130           |                     |                        |                                |                                |             | <i>Escherichia coli</i> strain E35BA                             | Spain             |
| 8  | RCS49_pIII           | <a href="#">LT985255.1</a> |                | 4 074           |                     |                        |                                |                                |             | <i>Escherichia coli</i> strain 580                               | France            |
| 9  | pV294-c              | <a href="#">LC056560.1</a> |                | 4 157           |                     |                        |                                |                                |             | <i>Escherichia coli</i> plasmid pV294-c                          | India             |
| 10 | pMRSN346647_4.1      | <a href="#">CP018208.1</a> |                | 4 074           |                     |                        |                                |                                |             | <i>Escherichia coli</i> strain MRSN346647                        | USA               |
| 11 | pSTM6-4              | <a href="#">CP019648.1</a> |                | 4 083           |                     |                        |                                |                                |             | <i>Salmonella enterica</i> serovar Typhimurium strain TW-Stm6    | Australia         |
| 12 | pYU39_5.1            | <a href="#">CP011432.1</a> |                | 5 093           |                     |                        |                                |                                |             | <i>Salmonella enterica</i> Serovar Typhimurium strain YU39       | Mexico            |
| 13 | pSD4.0               | <a href="#">JX566767.1</a> |                | 4 060           |                     |                        |                                |                                |             | <i>Salmonella enterica</i> subsp. enterica serovar Derby         | Germany           |
| 14 | RCS76_pIII           | <a href="#">LT985285.1</a> |                | 4 054           |                     |                        |                                |                                |             | <i>Escherichia coli</i> strain 13948                             | France            |
| 15 | pSMS35_4             | <a href="#">CP000973.1</a> |                | 4 074           |                     |                        |                                |                                |             | <i>Escherichia coli</i> SMS-3-5                                  | USA               |
| 16 | pEC224_7             | <a href="#">CP018941.1</a> |                | 4 062           |                     |                        |                                |                                |             | <i>Escherichia coli</i> strain Ecol_224                          | Viet Nam          |
| 17 | pSE11-6              | <a href="#">AP009246.1</a> |                | 4 082           |                     |                        |                                |                                |             | <i>Escherichia coli</i> SE11                                     | Japan             |
| 18 | pEC08-4              | <a href="#">JX238443.1</a> |                | 4 082           |                     |                        |                                |                                |             | <i>Escherichia coli</i> strain EC08                              | Sweden            |
| 19 | p2PCN033             | <a href="#">CP006634.1</a> |                | 4 086           |                     |                        |                                |                                |             | <i>Escherichia coli</i> PCN033                                   | China             |
| 20 | pE2022_4             | <a href="#">KT693143.1</a> |                | 4 082           |                     |                        |                                |                                |             | <i>Escherichia coli</i> strain E2022                             | Spain             |
| 21 | pEC29-1              | <a href="#">JX238447.1</a> |                | 4 082           |                     |                        |                                |                                |             | <i>Escherichia coli</i> strain EC29                              | Sweden            |
| 22 | pFV9873_1            | <a href="#">KT693144.1</a> |                | 4 081           |                     |                        |                                |                                |             | <i>Escherichia coli</i> strain FV9873                            | Spain             |
| 23 | FH182_scaffold-9     | <a href="#">LM996766.1</a> |                | 4 161           |                     |                        |                                |                                |             | <i>Escherichia coli</i> FH182                                    | Norway            |
| 24 | pVR50F               | <a href="#">CP011140.1</a> |                | 4 075           |                     |                        |                                |                                |             | <i>Escherichia coli</i> VR50                                     | Australia         |
| 25 | pEC542_4             | <a href="#">CP018966.1</a> |                | 4 087           |                     |                        |                                |                                |             | <i>Escherichia coli</i> strain Ecol_542                          | Viet Nam          |
| 26 | pMNCRE44_2           | <a href="#">CP010878.1</a> |                | 4 088           |                     |                        |                                |                                |             | <i>Escherichia coli</i> strain MNCRE44                           | USA               |
| 27 | pEC958B              | <a href="#">HG941720.1</a> |                | 4 080           |                     |                        |                                |                                |             | <i>Escherichia coli</i> ST131 strain EC958                       | Australia         |
| 28 | pEC299-2             | <a href="#">JX238458.1</a> |                | 4 088           |                     |                        |                                |                                |             | <i>Escherichia coli</i> strain EC299                             | Sweden            |
| 29 | RCS35_pI             | <a href="#">LT985232.1</a> |                | 4 087           |                     |                        |                                |                                |             | <i>Escherichia coli</i> 565                                      | France            |
| 30 | pEC648_4             | <a href="#">CP008718.1</a> |                | 4 073           |                     |                        |                                |                                |             | <i>Escherichia coli</i> strain ST648                             | China             |
| 31 | pC06114_7            | <a href="#">CP016041.1</a> |                | 4 071           |                     |                        |                                |                                |             | <i>Escherichia coli</i> isolate Co6114                           | Germany           |
| 32 | pEC881_5             | <a href="#">CP019024.1</a> |                | 4 063           |                     |                        |                                |                                |             | <i>Escherichia coli</i> strain Ecol_881                          | Colombia          |
| 33 | pEC147-4             | <a href="#">JX238455.1</a> |                | 4 071           |                     |                        |                                |                                |             | <i>Escherichia coli</i> strain EC147                             | Sweden            |
| 34 | pEC224_6             | <a href="#">CP018942.1</a> |                | 4 063           |                     |                        |                                |                                |             | <i>Escherichia coli</i> strain Ecol_224                          | Viet Nam          |
| 35 | pEC545_4             | <a href="#">CP018972.1</a> |                | 4 073           |                     |                        |                                |                                |             | <i>Escherichia coli</i> strain Ecol_545                          | Viet Nam          |
| 36 | pECAZ153_4           | <a href="#">CP018996.1</a> |                | 4 073           |                     |                        |                                |                                |             | <i>Escherichia coli</i> strain Ecol_AZ153                        | China             |
| 37 | pMRY16-002           | <a href="#">AP017616.1</a> |                | 4 073           |                     |                        |                                |                                |             | <i>Escherichia coli</i> 20Ec-P-124                               | Japan             |
| 38 | pV004-b              | <a href="#">LC056155.1</a> |                | 4 110           |                     |                        |                                |                                |             | <i>Escherichia coli</i> strain V004                              | India             |
| 39 | pEC08-3              | <a href="#">JX238442.1</a> |                | 4 071           |                     |                        |                                |                                |             | <i>Escherichia coli</i> strain EC08                              | Sweden            |
| 40 | pV044-c              | <a href="#">LC056172.1</a> |                | 3 976           |                     |                        |                                |                                |             | <i>Escherichia coli</i> V044                                     | India             |

**Table S4. Characteristics of the MOB<sub>repB2</sub> plasmids**

| No | Plasmid ID     | Accession no               | Co-integration | Plasmid size bp | Colicin operon type | Toxin/antitoxin system | Restriction/methylation system | antibiotic resistance gene | other genes | Bacterial host ID                                                 | Geographic origin |
|----|----------------|----------------------------|----------------|-----------------|---------------------|------------------------|--------------------------------|----------------------------|-------------|-------------------------------------------------------------------|-------------------|
| 1  | pEC147-3       | <a href="#">JX238454.1</a> |                | 3 904           |                     |                        |                                |                            |             | <i>Escherichia coli</i> strain EC147 plasmid pEC147-3             | Sweden            |
| 2  | p931-3904      | <a href="#">CP016386.1</a> |                | 3 904           |                     |                        |                                |                            |             | <i>Salmonella enteric</i> a subsp. enterica serovar Typhimurium   | USA               |
| 3  | pSF-088-3      | <a href="#">CP012638.1</a> |                | 3 904           |                     |                        |                                |                            |             | <i>Escherichia coli</i> strain SF-088                             | USA               |
| 4  | pN13-01290_3-3 | <a href="#">CP012935.1</a> |                | 3 905           |                     |                        |                                |                            |             | <i>Salmonella enterica</i> subsp. enterica serovar Heidelberg     | Canada            |
| 5  | pSAN1-1677     | <a href="#">CP019896.1</a> |                | 3 904           |                     |                        |                                |                            |             | <i>Salmonella enteric</i> a subsp. enterica serovar Anatum SAN222 | USA               |
| 6  | pBS512_5       | <a href="#">CP001060.1</a> |                | 5 114           |                     |                        |                                |                            |             | <i>Shigella boydii</i> CDC 3083-94                                | USA               |
| 7  | p75-02_5       | <a href="#">CP019693.1</a> |                | 5 114           |                     |                        |                                |                            |             | <i>Shigella sonnei</i> strain 75/02                               | Hungary           |
| 8  | pCFSAN030807_6 | <a href="#">CP023651.1</a> |                | 5 114           |                     |                        |                                |                            |             | <i>Shigella sonnei</i> strain CFSAN030807 plasmid                 | USA               |
| 9  | pSTY2-1899     | <a href="#">CP019895.1</a> |                | 3 910           |                     |                        |                                |                            |             | <i>Salmonella enterica</i> subsp. enterica serovar Typhimurium    | USA               |
| 10 | pCROD3         | <a href="#">FN543505.1</a> |                | 3 910           |                     |                        |                                |                            |             | <i>Citrobacter rodentium</i> ICC168                               | United Kingdom    |
| 11 | pCVM19633_4,   | <a href="#">CP001126.1</a> |                | 4 585           |                     |                        |                                |                            |             | <i>Salmonella enterica</i> subsp. enterica serovar Schwarzengrund | USA               |
| 12 | RCS90_pII      | <a href="#">LT985301.1</a> |                | 11 964          |                     |                        |                                | <i>strA/B</i>              |             | <i>Escherichia coli</i> strain ECOR 24                            | Sweden            |

**Table S5. Characteristics of the MOB<sub>RNA</sub> type 1 plasmids**

| No | Plasmid ID        | Accession no               | Co-integration | Plasmid size bp | Colicin operon type | Toxin/antitoxin system | Restriction/methylation system | antibiotic resistance gene  | other genes           | Bacterial host ID                                                  | Geographic origin |
|----|-------------------|----------------------------|----------------|-----------------|---------------------|------------------------|--------------------------------|-----------------------------|-----------------------|--------------------------------------------------------------------|-------------------|
| 1  | RCS33_pII         | LT985237                   |                | 6 647           | Colicin E1          |                        |                                |                             |                       | <i>Escherichia coli</i> strain 641                                 | France            |
| 2  | RCS76_pII         | LT985284                   |                | 6 649           | Colicin E1          |                        |                                |                             |                       | <i>Escherichia coli</i> strain13948                                | France            |
| 3  | pH1519-7          | <a href="#">KJ484632.1</a> |                | 7 036           | Colicin E1          |                        |                                |                             |                       | <i>Escherichia coli</i>                                            | Switzerland       |
| 4  | pEC276_KPC        | <a href="#">CP018949.1</a> |                | 16 559          | Colicin E1          |                        |                                | <i>bla</i> <sub>KPC-2</sub> |                       | <i>Escherichia coli</i> strain Ecol_276                            | USA               |
| 5  | pCE-R2-11-0435_6  | <a href="#">CP016519.1</a> |                | 6 647           | Colicin E1          |                        |                                |                             |                       | <i>Salmonella enterica</i> serovar Heidelberg strain CE-R2-11-0435 | Canada            |
| 6  | FHI99 scaffold-9  | <a href="#">LM997248.1</a> |                | 9 449           | Colicin E1          |                        |                                |                             |                       | <i>Escherichia coli</i> genome assembly FHI99,                     | Norway            |
| 7  | pEC224_5          | <a href="#">CP018943.1</a> |                | 6 647           | Colicin E1          |                        |                                |                             |                       | <i>Escherichia coli</i> strain Ecol_224                            | Viet Nam          |
| 8  | pSF-468-3         | <a href="#">CP012628.1</a> |                | 6 647           | Colicin E1          |                        |                                |                             |                       | <i>Escherichia coli</i> strain SF-468                              | USA               |
| 9  | pSH14-028_6       | <a href="#">CP016513.1</a> |                | 6 647           | Colicin E1          |                        |                                |                             |                       | <i>Salmonella enterica</i> serovar Heidelberg strain SH14-028      | Canada            |
| 10 | H8 plasmid C      | <a href="#">CP010175.1</a> |                | 6 647           | Colicin E1          |                        |                                |                             |                       | <i>Escherichia coli</i> strain H8                                  | China             |
| 11 | ColE1             | <a href="#">J01566.1</a>   |                | 6 646           | Colicin E1          |                        |                                |                             |                       | <i>Escherichia coli</i>                                            | -                 |
| 12 | pEC881_4          | <a href="#">CP019025.1</a> |                | 6 647           | Colicin E1          |                        |                                |                             |                       | <i>Escherichia coli</i> strain Ecol_881                            | Colombia          |
| 13 | pEC158            | <a href="#">HQ425708.1</a> |                | 5 706           |                     |                        | Eco8I type II                  |                             |                       | <i>Escherichia coli</i> strain G8                                  | Poland            |
| 14 | pSL491_5          | <a href="#">CP001148.1</a> |                | 5 880           |                     |                        |                                |                             | transporter           | <i>Salmonella enterica</i> serovar Virchow str. SL491              | USA               |
| 15 | pSLy5             | <a href="#">CP015917.1</a> |                | 8 972           | Colicin E1          |                        |                                |                             |                       | <i>Escherichia coli</i> strain 210205630                           | USA               |
| 16 | plasmid pC        | <a href="#">AY079201.1</a> |                | 5 269           |                     |                        | Eco29KI type II                |                             |                       | <i>Salmonella enteritidis</i> serovar Enteritidis                  | Czech republic    |
| 17 | EC11 p4           | <a href="#">CP027259.1</a> |                | 6 812           | colicin N           |                        |                                |                             |                       | <i>Escherichia coli</i> strain EC11                                | China             |
| 18 | pACN001-C         | <a href="#">KC853436.1</a> |                | 5 784           |                     |                        |                                |                             |                       | <i>Escherichia coli</i> ACN001                                     | China             |
| 19 | TGH10 Plasmid     | <a href="#">CP012744.1</a> | chromosome     |                 | - Colicin E1        |                        |                                |                             |                       | <i>Klebsiella pneumoniae</i> strain TGH10                          | Belgium           |
| 20 | RCS37_pl          | LT985230                   |                | 10 551          |                     |                        |                                | <i>bla</i> <sub>TEM-1</sub> |                       | <i>Escherichia coli</i> strain 730                                 | France            |
| 21 | FHI58 scaffold-5  | <a href="#">LM995959.1</a> |                | 9 649           | Colicin E1          |                        | EcoRI type II                  |                             |                       | <i>Escherichia coli</i> FHI58                                      | Norway            |
| 22 | FHI63 scaffold-18 | <a href="#">LM996433.1</a> |                | 9 690           | Colicin E1          |                        | EcoRI type II                  |                             |                       | <i>Escherichia coli</i> FHI63                                      | Norway            |
| 23 | pSE11-4           | <a href="#">AP009244.1</a> |                | 6 929           |                     |                        |                                |                             |                       | <i>Escherichia coli</i> SE11                                       | Japan             |
| 24 | pSPI12            | <a href="#">GU949535.1</a> |                | 4 080           |                     |                        |                                |                             |                       | <i>Salmonella enterica</i> serovar Pullorum strain S06004          | China             |
| 25 | pSFD10            | <a href="#">AY048853.1</a> |                | 4 091           |                     |                        |                                |                             |                       | <i>Salmonella choleraesuis</i> strain 79500                        | China             |
| 26 | pSMS35_8          | <a href="#">CP000972.1</a> |                | 8 909           | Colicin E1          |                        |                                |                             |                       | <i>Escherichia coli</i> SMS-3-5                                    | USA               |
| 27 | pEC159            | <a href="#">JN692546.1</a> |                | 6 292           |                     |                        | EcoRV type II                  |                             |                       | <i>Escherichia coli</i>                                            | Poland            |
| 28 | pLG13             | <a href="#">AF251289.1</a> |                | 6 293           |                     |                        | EcoRV type II                  |                             |                       | <i>Escherichia coli</i>                                            | Russia            |
| 29 | pWQ799            | <a href="#">L39794.1</a>   |                | 6 915           |                     |                        |                                |                             | glycosyltransferase   | <i>Salmonella enterica</i> serovar Borreze                         | Canada            |
| 30 | pETEC_5           | <a href="#">CP000801.1</a> |                | 5 033           |                     |                        |                                |                             |                       | <i>Escherichia coli</i> E24377A                                    | USA               |
| 31 | p75               | <a href="#">FN822749.1</a> |                | 7 497           |                     |                        |                                |                             |                       | <i>Escherichia coli</i> ETEC 1392/75                               | United Kingdom    |
| 32 | pEC34B            | <a href="#">HQ622576.1</a> |                | 6 952           |                     |                        | EcoO34I type II                |                             |                       | <i>Escherichia coli</i> strain NCTC 9034                           | Poland            |
| 33 | pDT1              | <a href="#">HF565445.2</a> |                | 5 262           | Colicin Js          |                        |                                |                             |                       | <i>Shigella sonnei</i> EG211                                       | Vietnam           |
| 34 | p12579_5          | <a href="#">CP003114.1</a> |                | 5 954           |                     |                        | Eco12579 type II               |                             |                       | <i>Escherichia coli</i> O55:H7 str. RM12579                        | USA               |
| 35 | pFAM21845_3       | <a href="#">CP017223.1</a> |                | 5 828           |                     |                        | Ssoll type II                  |                             |                       | <i>Escherichia coli</i> strain FAM21845                            | Switzerland       |
| 36 | pHSD              | <a href="#">Y16897.2</a>   |                | 5 571           |                     |                        | Ecl18KI type II                |                             |                       | <i>Enterobacter cloacae</i> HSD                                    | Russia            |
| 37 | pSTd4             | <a href="#">HQ730898.1</a> |                | 5 569           |                     |                        | StyD4I type II                 |                             |                       | <i>Salmonella enterica</i> serovar Typhi                           | Poland            |
| 38 | pO26_3            | <a href="#">AP010956.1</a> |                | 5 686           |                     |                        | CfrBI type II                  |                             |                       | <i>Escherichia coli</i> O26:H11 str. 11368                         | Japan             |
| 39 | pSD5.6            | <a href="#">JX566769.1</a> |                | 5 784           |                     |                        | CfrBI type II                  |                             |                       | <i>Salmonella enterica</i> serovar Derby                           | Germany           |
| 40 | pEC16II           | <a href="#">KU932034.1</a> |                | 7 939           |                     |                        |                                |                             | Cupin ABC transporter | <i>Escherichia coli</i>                                            | Finland           |
| 41 | pHUSEC41-3        | <a href="#">HE603112.1</a> |                | 7 930           |                     |                        |                                |                             | Cupin ABC transporter | <i>Escherichia coli</i> HUSEC41                                    | Germany           |

|                     |                            |                   |                                          |                            |                                                                 |                |
|---------------------|----------------------------|-------------------|------------------------------------------|----------------------------|-----------------------------------------------------------------|----------------|
| 42 pV097-a          | <a href="#">LC056262.1</a> | 4 081             |                                          |                            | <i>Escherichia coli</i> strain V097                             | India          |
| 43 p5217            | <a href="#">EU580135.1</a> | 5 217             |                                          |                            | <i>Escherichia coli</i> strain E2348/69                         | Canada         |
| 44 pSB13            | <a href="#">HQ404303.1</a> | 5 424             |                                          | Sbo13I type II             | <i>Shigella boydii</i>                                          | Poland         |
| 45 pSF301-3         | <a href="#">JF813188.1</a> | 4 043             |                                          |                            | <i>Shigella flexneri</i> strain 2a 301                          | China          |
| 46 pSFxv_4          | <a href="#">CP001387.1</a> | 4 042             |                                          |                            | <i>Shigella flexneri</i> 2002017                                | China          |
| 47 ColJs            | <a href="#">AF282884.1</a> | 5 210 Colicin Js  |                                          |                            | <i>Shigella sonnei</i> Colicin Js type 7 producer               | Czech Republic |
| 48 RCS82_pII        | LT985303                   | 23 526 Colicin E1 | <i>CCDAVB</i><br>( <i>Replicon FIR</i> ) |                            | <i>Escherichia coli</i> ECOR 39                                 | Sweden         |
| 49 FHI90 scaffold-9 | <a href="#">LM997292.1</a> | 6 983 Colicin E1  |                                          |                            | <i>Escherichia coli</i> FHI90                                   | Norway         |
| 50 pColE1-MRE600    | <a href="#">CP014198.2</a> | 7 057 Colicin E1  |                                          |                            | <i>Escherichia coli</i> strain MRE600                           | United Kingdom |
| 51 plasmid B M6     | <a href="#">CP010188.1</a> | 6 039             |                                          |                            | <i>Escherichia coli</i> strain M6                               | China          |
| 52 pCFSAN017963_02, | <a href="#">CP017722.1</a> | 7 665             |                                          | CfrBI type II              | <i>Salmonella enterica</i> serovar Minnesota strain CFSAN017963 | USA            |
| 53 RCS83_pIII       | LT985292                   | 5 912             |                                          |                            | <i>Escherichia coli</i> ECOR 10                                 | USA            |
| 54 p14408_3         | <a href="#">LT599828.1</a> | 11 988 Colicin R  |                                          |                            | <i>Escherichia coli</i> NRZ14408                                | Germany        |
| 55 C8 plasmid C     | <a href="#">CP010128.1</a> | 7 982 Colicin E1  |                                          |                            | <i>Escherichia coli</i> strain C8                               | China          |
| 56 pMRSN346355_5.3  | <a href="#">CP018126.1</a> | 5 310             |                                          | <i>aph(3')-I</i>           | <i>Escherichia coli</i> strain MRSN346355                       | USA            |
| 57 pECAZ146_6       | <a href="#">CP018985.1</a> | 5 631             |                                          | EamA family transporter    | <i>Escherichia coli</i> strain Ecol_AZ146                       | Italy          |
| 58 pJJ1886_3,       | <a href="#">CP006787.1</a> | 5 631             |                                          |                            | <i>Escherichia coli</i> JJ1886                                  | USA            |
| 59 pVR50D           | <a href="#">CP011138.1</a> | 5 631             |                                          | Permease transporter (DMT) | <i>Escherichia coli</i> VR50                                    | Australia      |
| 60 RCS93_pIII       | LT985310                   | 5 631             |                                          |                            | <i>Escherichia coli</i> CIP106224                               | United Kingdom |

**Table S6. Characteristics of the MOB<sub>RNA</sub> type 2 plasmids**

| No | Plasmid ID                   | Accession no               | Co-integration | Plasmid size bp | Colicin operon type | Toxin/antitoxin system | Restriction/methylation system | antibiotic resistance gene | other genes | Bacterial host ID                                                   | Geographic origin |
|----|------------------------------|----------------------------|----------------|-----------------|---------------------|------------------------|--------------------------------|----------------------------|-------------|---------------------------------------------------------------------|-------------------|
| 1  | pECAZ146_4                   | <a href="#">CP018987.1</a> |                | 6 994           | Colicin K           |                        |                                |                            |             | <i>Escherichia coli</i> strain Ecol_AZ146                           | Italy             |
| 2  | FHI99, scaffold scaffold-7   | <a href="#">LM997246.1</a> |                | 6 965           | Colicin K           |                        |                                |                            |             | <i>Escherichia coli</i> genome assembly FHI99, scaffold scaffold-7  | Norway            |
| 3  | FHI100, scaffold scaffold-5  | <a href="#">LK985402.1</a> |                | 6 965           | Colicin K           |                        |                                |                            |             | <i>Escherichia coli</i> genome assembly FHI100, scaffold scaffold-5 | Norway            |
| 4  | RCS74_pII                    | <a href="#">LT985282.1</a> |                | 7 133           | Colicin S4          |                        |                                |                            |             | <i>Escherichia coli</i> strain 13942-1                              | France            |
| 5  | FHI89, scaffold scaffold-10_ | <a href="#">LM997028.1</a> |                | 7 008           | Colicin K           |                        |                                |                            |             | <i>Escherichia coli</i> genome assembly FHI89, scaffold scaffold-10 | Norway            |
| 6  | Pvr50c                       | <a href="#">CP011137.1</a> |                | 6 989           | Colicin K           |                        |                                |                            |             | <i>Escherichia coli</i> VR50                                        | Australia         |
| 7  | pColK-K235                   | <a href="#">AY929248.1</a> |                | 8 318           | Colicin K           |                        |                                |                            |             | <i>Escherichia coli</i>                                             | Slovenia          |
| 8  | FHI65, scaffold scaffold-9_  | <a href="#">LM996510.1</a> |                | 8 785           |                     |                        |                                |                            | transporter | <i>Escherichia coli</i> genome assembly FHI65, scaffold scaffold-9  | Norway            |
| 9  | RCS55_pII                    | <a href="#">LT985386.1</a> |                | 6 859           | Colicin S4          |                        |                                |                            |             | <i>Escherichia coli</i> strain 694                                  | France            |
| 10 | pSYM12                       | <a href="#">KM107848.1</a> |                | 7 111           | Colicin S4          |                        |                                |                            |             | <i>Escherichia coli</i> strain G1/2                                 | Germany           |
| 11 | FHI87, scaffold scaffold-7   | <a href="#">LM996983.1</a> |                | 6 668           | Colicin D           |                        |                                |                            |             | <i>Escherichia coli</i> genome assembly FHI87, scaffold scaffold-7  | Norway            |
| 12 | FHI20, scaffold scaffold-5_  | <a href="#">LM995793.1</a> |                | 6 664           | Colicin D           |                        |                                |                            |             | <i>Escherichia coli</i> genome assembly FHI20, scaffold scaffold-5  | Norway            |
| 13 | pColD-157                    | <a href="#">Y10412.1</a>   |                | 6 675           | Colicin D           |                        |                                |                            |             | <i>Escherichia coli</i> plasmid pColD-157 DNA                       | Germany           |
| 14 | pO177C1                      | <a href="#">CP024615.1</a> |                | 6 675           | Colicin D           |                        |                                |                            |             | <i>Escherichia coli</i> strain SMN152SH1                            | USA               |
| 15 | pO177C3                      | <a href="#">CP024053.1</a> |                | 6 675           | Colicin D           |                        |                                |                            |             | <i>Escherichia coli</i> strain SMN197SH3                            | Canada            |
| 16 | D10 plasmid B                | <a href="#">CP010159.1</a> |                | 6 822           | Colicin 10          |                        |                                |                            |             | <i>Escherichia coli</i> strain D10                                  | China             |
| 17 | FHI42, scaffold scaffold-8   | <a href="#">LK999928.1</a> |                | 5 959           | Colicin 10          |                        |                                |                            |             | <i>Escherichia coli</i> genome assembly FHI42, scaffold scaffold-8  | Norway            |
| 18 | pACN001-E                    | <a href="#">KC853438.1</a> |                | 6 822           | Colicin 10          |                        |                                |                            |             | <i>Escherichia coli</i> ACN001                                      | China             |
| 19 | pO111_5                      | <a href="#">AP010965.1</a> |                | 6 673           | Colicin D           |                        |                                |                            |             | <i>Escherichia coli</i> O111:H- str. 11128                          | Japan             |
| 20 | pO104:H7_S1                  | <a href="#">KM085451.1</a> |                | 6 819           | Colicin 10          |                        |                                |                            |             | <i>Escherichia coli</i> O104:H7 strain RM9387                       | USA               |
| 21 | pO104:H7_S2                  | <a href="#">KM085452.1</a> |                | 6 673           | Colicin D           |                        |                                |                            |             | <i>Escherichia coli</i> O104:H7 strain RM9387                       | USA               |
| 23 | FHI30, scaffold scaffold-7   | <a href="#">LM995877.1</a> |                | 6 144           | Colicin K           |                        |                                |                            |             | <i>Escherichia coli</i> genome assembly FHI30, scaffold scaffold-7  | Norway            |
| 23 | FHI23, scaffold scaffold-9   | <a href="#">LM995623.1</a> |                | 4 222           |                     |                        |                                |                            |             | <i>Escherichia coli</i> genome assembly FHI23, scaffold scaffold-9  | Norway            |
| 24 | FHI6, scaffold scaffold-9_   | <a href="#">LM996333.1</a> |                | 7 424           | Colicin D           |                        |                                |                            |             | <i>Escherichia coli</i> genome assembly FHI6, scaffold scaffold-9   | Norway            |
| 25 | FHI97, scaffold scaffold-14  | <a href="#">LM997189.1</a> |                | 7 409           | Colicin D           |                        |                                |                            |             | <i>Escherichia coli</i> genome assembly FHI97, scaffold scaffold-14 | Norway            |

Table S7. Characteristics of the MOB<sub>RNA</sub> type 3 plasmids

| No | Plasmid ID                | Accession no               | Co-integration | Plasmid size bp | Colicin operon type | Toxin/antitoxin system | Restriction/methylation system | antibiotic resistance gene  | other genes | Bacterial host ID*                                                                             | Geographic origin | Plant disease      |
|----|---------------------------|----------------------------|----------------|-----------------|---------------------|------------------------|--------------------------------|-----------------------------|-------------|------------------------------------------------------------------------------------------------|-------------------|--------------------|
| 1  | pSZECL_b                  | <a href="#">KU302804.1</a> |                | 3 223           |                     |                        |                                |                             |             | <i>Enterobacter cloacae</i> strain SZECL1                                                      | China             |                    |
| 2  | pV046-a                   | <a href="#">LC056197.1</a> |                | 3 629           |                     |                        |                                |                             |             | <i>Escherichia coli</i> strain V046                                                            | India             |                    |
| 3  | pSTY4-2010K-1587          | <a href="#">CP016867.1</a> |                | 3 223           |                     |                        |                                |                             |             | <i>Salmonella enterica</i> serovar Typhimurium str. CDC 2010K-1587 strain USDA-ARS-USMARC-1908 | USA               |                    |
| 4  | pKpN01-COL                | <a href="#">CP012991.1</a> |                | 3 223           |                     |                        |                                |                             |             | <i>Klebsiella pneumoniae</i> strain KpN01                                                      | Canada            |                    |
| 5  | pKP13b                    | <a href="#">CP003994.1</a> |                | 3 223           |                     |                        |                                |                             |             | <i>Klebsiella pneumoniae</i> Kp13                                                              | Brazil            |                    |
| 6  | pCAV1741-3223             | <a href="#">CP011652.1</a> |                | 3 223           |                     |                        |                                |                             |             | <i>Citrobacter freundii</i> strain CAV1741                                                     | USA               |                    |
| 7  | pCAV1492-3223             | <a href="#">CP011637.1</a> |                | 3 223           |                     |                        |                                |                             |             | <i>Serratia marcescens</i> strain CAV1492                                                      | USA               |                    |
| 8  | pCAV1311-3223             | <a href="#">CP011569.1</a> |                | 3 223           |                     |                        |                                |                             |             | <i>Enterobacter cloacae</i> strain CAV1311                                                     | USA               |                    |
| 9  | pCAV1176-3223             | <a href="#">CP011658.1</a> |                | 3 223           |                     |                        |                                |                             |             | <i>Enterobacter hormaechei</i> strain CAV1176                                                  | USA               |                    |
| 10 | pCAV1042-3223             | <a href="#">CP018666.1</a> |                | 3 223           |                     |                        |                                |                             |             | <i>Klebsiella pneumoniae</i> strain CAV1042                                                    | USA               |                    |
| 11 | p_incR_DHQP1002001        | <a href="#">CP016812.1</a> | IncR           | 65 887          |                     |                        |                                |                             |             | <i>Klebsiella pneumoniae</i> strain DHQP1002001                                                | USA               |                    |
| 12 | KSB1_4E plasmid unnamed 4 | <a href="#">CP024503.1</a> |                | 3 223           |                     |                        |                                |                             |             | <i>Klebsiella pneumoniae</i> strain KSB1_4E                                                    | Australia         |                    |
| 13 | INF322 plasmid unnamed 5  | <a href="#">CP024487.1</a> |                | 3 223           |                     |                        |                                |                             |             | <i>Klebsiella pneumoniae</i> strain INF322                                                     | Australia         |                    |
| 14 | pV266-a                   | <a href="#">LC056487.1</a> |                | 2 965           |                     |                        |                                |                             |             | <i>Escherichia coli</i> strain V266                                                            | China             |                    |
| 15 | pRK10                     | <a href="#">EU697813.1</a> |                | 4 241           |                     |                        |                                |                             |             | <i>Serratia marcescens</i> strain ACE2                                                         | India             |                    |
| 16 | pEC867_KPC                | <a href="#">CP018981.1</a> |                | 14 029          |                     |                        |                                | <i>bla</i> <sub>KPC-3</sub> |             | <i>Escherichia coli</i> strain EcoI_867                                                        | Canada            |                    |
| 17 | pSAN2-06-0624             | <a href="#">CP019997.1</a> |                | 4 018           |                     |                        |                                |                             |             | <i>Salmonella enterica</i> serovar Anatum str. USDA-ARS-USMARC-1765                            | USA               |                    |
| 18 | p34977-5.006kb            | <a href="#">CP010375.2</a> |                | 5 007           |                     |                        |                                |                             |             | <i>Enterobacter hormaechei</i> subsp. steigerwaltii strain 34977                               | USA               |                    |
| 19 | pSZECL_g                  | <a href="#">KU302809.1</a> |                | 5 522           |                     |                        |                                |                             |             | <i>Enterobacter cloacae</i> strain SZECL1                                                      | China             |                    |
| 20 | AR_0365 plasmid unnamed4  | <a href="#">CP027141.1</a> |                | 4 604           |                     |                        |                                |                             |             | <i>Enterobacter cloacae</i> complex 'Hoffmann cluster III' strain AR_0365                      | USA               |                    |
| 21 | pASM4                     | <a href="#">CP019843.1</a> |                | 4 667           |                     |                        |                                |                             |             | <i>Enterobacter cloacae</i> strain R11                                                         | China             |                    |
| 22 | pEC278                    | <a href="#">AY589571.1</a> |                | 4 669           |                     |                        |                                |                             |             | <i>Escherichia coli</i> strain 278B                                                            | UK                |                    |
| 23 | pSD4.6                    | <a href="#">JX566768.1</a> |                | 4 664           |                     |                        |                                |                             |             | <i>Salmonella enterica</i> subsp. enterica serovar Derby                                       | Germany           |                    |
| 24 | p09-036813-1A_4           | <a href="#">CP016528.1</a> |                | 4 096           |                     |                        |                                |                             |             | <i>Salmonella enterica</i> serovar Heidelberg strain 09-036813-1A                              | Canada            |                    |
| 25 | pCAV1321-4310             | <a href="#">CP011606.1</a> |                | 4 310           |                     |                        |                                |                             |             | <i>Citrobacter freundii</i> strain CAV1321                                                     | USA               |                    |
| 26 | pLK39                     | <a href="#">GQ353340.1</a> |                | 4 029           |                     |                        |                                |                             |             | Endophytic <i>Salmonella</i> sp LOB-07                                                         | Brazil            | Solanum lycocarpum |
| 27 | pDSJ01                    | <a href="#">CP017582.1</a> |                | 4 277           |                     |                        |                                |                             |             | <i>Pantoea stewartii</i> subsp. stewartii DC283                                                | USA               | Corn pathogen      |
| 28 | pSW100                    | <a href="#">L37403.1</a>   |                | 4 272           |                     |                        |                                |                             |             | <i>Pantoea stewartii</i> (Erwinia )SW2                                                         | USA               | Corn pathogen      |
| 29 | pSA01AB09084001_4         | <a href="#">CP016532.1</a> |                | 4 245           |                     |                        |                                |                             |             | <i>Salmonella enterica</i> serovar Heidelberg strain SA01AB09084001                            | Canada            |                    |
| 30 | RCS91_p                   | <a href="#">LT985299.1</a> |                | 9 890           |                     |                        |                                | <i>tet</i> (A)              |             | <i>Escherichia coli</i> strain ECOR 6                                                          | USA               |                    |
| 31 | pK                        | <a href="#">AY079200.1</a> |                | 4 245           |                     |                        |                                |                             |             | <i>Salmonella enterica</i> serovar Enteritidis                                                 | Czech Republic    |                    |
| 32 | pSYM7                     | <a href="#">KM107843.1</a> |                | 4 452           |                     |                        |                                |                             |             | <i>Escherichia coli</i> strain G5                                                              | Germany           |                    |
| 33 | pHL1 Eco1524I             | <a href="#">EU863203.1</a> |                | 5 850           |                     |                        | Eco1524 Type II                |                             |             | <i>Escherichia coli</i> strain 1524a                                                           | Tunisia           |                    |
| 34 | pBERT                     | <a href="#">AF025795.1</a> |                | 4 656           |                     |                        |                                |                             |             | <i>Salmonella enterica</i> serovar Berta                                                       | USA               |                    |
| 35 | pCN061p2                  | <a href="#">CP006638.1</a> |                | 5 754           |                     |                        |                                |                             |             | <i>Escherichia coli</i> PCN061                                                                 | China             |                    |
| 36 | pCY-MdT                   | <a href="#">KF998105.1</a> |                | 5 933           |                     |                        |                                | <i>aaC</i> (6')-Ib          |             | <i>Enterobacter cloacae</i> strain CY01                                                        | China             |                    |
| 37 | pMdT1                     | <a href="#">JX457478.1</a> |                | 5 931           |                     |                        |                                | <i>aac</i> (6')-Ib          |             | <i>Salmonella enterica</i> serovar Typhimurium                                                 | Spain             |                    |
| 38 | pSEEH1578_03              | <a href="#">CP004857.1</a> |                | 4 773           |                     |                        |                                |                             |             | <i>Salmonella enterica</i> serovar Heidelberg str. 41578                                       | USA               |                    |



|    |                                |                            |        |                                                          |                                                                                                   |                |                        |
|----|--------------------------------|----------------------------|--------|----------------------------------------------------------|---------------------------------------------------------------------------------------------------|----------------|------------------------|
| 39 | pSH1148_4.8                    | <a href="#">JX494965.1</a> | 4 775  |                                                          | <i>Salmonella enterica</i> subsp. <i>enterica</i> serovar Heidelberg                              | USA            |                        |
| 40 | RCS48_pIII                     | <a href="#">LT985246.1</a> | 4 772  |                                                          | <i>Escherichia coli</i> strain 720                                                                | France         |                        |
| 41 | RCS49_pIII                     | <a href="#">LT985254.1</a> | 15 843 | <i>bla</i> <sub>SHV-12</sub> <i>bla</i> <sub>TEM-1</sub> | <i>Escherichia coli</i> strain 580                                                                | France         |                        |
| 42 | pDSJ02                         | <a href="#">CP017583.1</a> | 4 368  |                                                          | <i>Pantoea stewartii</i> subsp. <i>stewartii</i> DC283                                            | USA            | Corn pathogen          |
| 43 | pSW200                         | <a href="#">L42525.1</a>   | 4 368  |                                                          | <i>Pantoea stewartii</i> (Erwinia )SW2                                                            | USA            | Corn pathogen          |
| 44 | CFSAN001921<br>plasmid unmamed | <a href="#">CP006051.1</a> | 4 675  |                                                          | <i>Salmonella enterica</i> serovar Typhimurium var. 5- str. CFSAN001921                           | USA            |                        |
| 45 | pSTY3-2010K-1587               | <a href="#">CP016866.1</a> | 4 675  |                                                          | <i>Salmonella enterica</i> serovar Typhimurium str. CDC 2010K-1587<br>strain USDA-ARS-USMARC-1908 | USA            |                        |
| 46 | pEC3                           | <a href="#">D45188.1</a>   | 3 000  |                                                          | <i>Pectobacterium carotovorum</i> (Erwinia carotovora)                                            | Japan          | Solanum tuberosum      |
| 47 | pSCC1                          | <a href="#">CP021895.1</a> | 5 524  |                                                          | <i>Pectobacterium carotovorum</i> strain SCC1 (Erwinia carotovora)                                | Finland        | Solanum tuberosum      |
| 48 | pUCD5000                       | <a href="#">AF022806.1</a> | 5 229  |                                                          | <i>Tatumella morbirosei</i> (Pantoea citrea)                                                      | USA            | pineapple pink disease |
| 49 | pTPqnrS-1a                     | <a href="#">AM746977.1</a> | 10 066 | <i>qnrS1</i>                                             | <i>Salmonella enterica</i> serovar Typhimurium                                                    | United Kingdom |                        |
| 50 | p10k                           | <a href="#">CP025337.1</a> | 10 047 | <i>qnrS1</i>                                             | <i>Salmonella enterica</i> serovar Typhimurium strain BL10                                        | Taiwan         |                        |
| 51 | pHLR25                         | <a href="#">HE652087.1</a> | 10 047 | <i>qnrS1</i>                                             | <i>Salmonella enterica</i> serovar Typhimurium HLR25                                              | Spain          |                        |
| 52 | pQnrS1-cp17s                   | <a href="#">JN393220.1</a> | 10 047 | <i>qnrS1</i>                                             | <i>Salmonella enterica</i> serovar Typhimurium strain 484                                         | Viet Nan       |                        |
| 53 | pSQR1                          | <a href="#">KJ187750.1</a> | 10 047 | <i>qnrS1</i>                                             | <i>Salmonella enterica</i> serovar Typhimurium strain AC06.010                                    | Taiwan         |                        |
| 54 | pST728/06-2                    | <a href="#">EU715253.1</a> | 10 107 | <i>qnrS1</i>                                             | <i>Salmonella enterica</i> serovar Typhimurium                                                    | Taiwan         |                        |

\* Plant pathogens are highlighted in green

**Table S8. Characteristics of the MOB<sub>RNA</sub> type 4 plasmids**

| No | Plasmid ID                   | Accession no               | Co-integration | Plasmid size bp | Colicin operon type | Toxin/antitoxin system | Restriction/methylation system | antibiotic resistance gene                                | other genes | Bacterial host ID                                   | Geographic origin |
|----|------------------------------|----------------------------|----------------|-----------------|---------------------|------------------------|--------------------------------|-----------------------------------------------------------|-------------|-----------------------------------------------------|-------------------|
| 1  | pKPN-819                     | <a href="#">CP008799.1</a> | IncX3          | 58 050          | Cloacin             | ParE1                  |                                | <i>aac6'-lb-Tn3</i> , <i>bla</i> <sub>TEM-1</sub>         |             | <i>Klebsiella pneumoniae</i> KPNIH24                | USA               |
| 2  | plasmid 15S                  | <a href="#">FJ223606.1</a> |                | 23 753          | Cloacin             | ParE <sub>1</sub>      |                                | <i>aac6'-lb-Tn3</i> , <i>bla</i> <sub>KPC-2</sub>         |             | <i>Klebsiella pneumoniae</i> strain S15             | USA               |
| 3  | pECAZ161_KPC                 | <a href="#">CP019010.1</a> | Inc unknown    | 55 746          | Cloacin             | ParE1                  |                                | <i>bla</i> <sub>TEM-1</sub> , <i>bla</i> <sub>KPC-3</sub> |             | <i>Escherichia coli</i> strain EcoL_AZ161           | USA               |
| 4  | pIGMS32                      | <a href="#">DQ298019.1</a> |                | 9 294           | Cloacin             | ParE <sub>1</sub>      |                                |                                                           |             | <i>Klebsiella pneumoniae</i>                        | poland            |
| 5  | pAAC154-a9e                  | <a href="#">CP009877.1</a> |                | 15 100          | Cloacin             | ParE1                  |                                | <i>aac6'-lb-Tn3</i>                                       |             | <i>Klebsiella pneumoniae</i> strain KPNIH31         | USA               |
| 6  | AR_0125 plasmid tig00000007  | <a href="#">CP021860.1</a> |                | 24 749          | Cloacin             | ParE <sub>1</sub>      |                                | <i>aac6'-lb-Tn3</i> , <i>bla</i> <sub>KPC-3</sub>         |             | <i>Klebsiella pneumoniae</i> strain AR_0125         | USA               |
| 7  | HUG07 plasmid p4             | <a href="#">CP019776.1</a> |                | 14 027          | Cloacin             | ParE1                  |                                | <i>aac6'-lb-Tn3</i>                                       |             | <i>Klebsiella pneumoniae</i> strain KPN_KPC_HUG_07  | Switzerland       |
| 8  | pAAC154-a50                  | <a href="#">CP007728.1</a> |                | 15 096          | Cloacin             | ParE <sub>1</sub>      |                                | <i>aac6'-lb-Tn3</i>                                       |             | <i>Klebsiella pneumoniae</i> KPNIH10                | USA               |
| 9  | pCAV1453-14                  | <a href="#">CP018353.1</a> |                | 13 841          | Cloacin             | ParE1                  |                                | <i>aac6'-lb-Tn3</i>                                       |             | <i>Klebsiella pneumoniae</i> strain CAV1453         | USA               |
| 10 | ColEST258                    | <a href="#">JN247853.1</a> |                | 13636           | Δ Cloacin           | ParE <sub>1</sub>      |                                | <i>aac6'-lb-Tn3</i>                                       |             | <i>Klebsiella pneumoniae</i>                        | Italia            |
| 11 | pAp                          | <a href="#">CP024651.1</a> |                | 14 241          | Cloacin             | ParE1                  |                                | <i>bla</i> <sub>TEM-1</sub>                               |             | <i>Escherichia coli</i> strain BH100 substr. MG2014 | Brazil            |
| 12 | pCAV1417                     | <a href="#">CP018348.1</a> |                | 9 940           | Cloacin             | ParE <sub>1</sub>      |                                |                                                           |             | <i>Klebsiella pneumoniae</i> strain CAV1417         | USA               |
| 13 | pBIC-1c                      | <a href="#">CP022576.1</a> |                | 13 841          | Cloacin             | ParE1                  |                                | <i>aac6'-lb-Tn3</i>                                       |             | <i>Klebsiella pneumoniae</i> strain BIC-1           | France            |
| 14 | pCKO3                        | <a href="#">CP000823.1</a> |                | 9 294           | Cloacin             | ParE <sub>1</sub>      |                                |                                                           |             | <i>Citrobacter koseri</i> ATCC BAA-895              | USA               |
| 15 | AR_0047 plasmid tig00000004  | <a href="#">CP021543.1</a> |                | 15 271          | Cloacin             | ParE1                  |                                | <i>aac6'-lb-Tn3</i>                                       |             | <i>Klebsiella pneumoniae</i> strain AR_0047         | USA               |
| 16 | AR0098 plasmid tig00000004   | <a href="#">CP020112.1</a> |                | 13 841          | Cloacin             | ParE <sub>1</sub>      |                                | <i>aac6'-lb-Tn3</i>                                       |             | <i>Klebsiella pneumoniae</i> strain AR_0098         | USA               |
| 17 | p38544-85.403kb              | <a href="#">CP010362.1</a> | IncR           | 85 403          | Cloacin             | ParE1                  |                                | <i>aac6'-lb-Tn3</i>                                       |             | <i>Klebsiella pneumoniae</i> strain 38544           | USA               |
| 18 | pKP64477e                    | <a href="#">MF150119.1</a> |                | 9 294           | Cloacin             | ParE <sub>1</sub>      |                                |                                                           |             | <i>Klebsiella pneumoniae</i> strain A64477          | Brazil            |
| 19 | pMNCRE53_1                   | <a href="#">CP018433.1</a> |                | 15 273          | Cloacin             | ParE1                  |                                | <i>aac6'-lb-Tn3</i>                                       |             | <i>Klebsiella pneumoniae</i> strain MNCRE53         | USA               |
| 20 | pNY9_6                       | <a href="#">CP015391.1</a> |                | 11 090          | Δ Cloacin           | ParE <sub>1</sub>      |                                |                                                           |             | <i>Klebsiella pneumoniae</i> strain NY9             | USA               |
| 21 | pDMC1097                     | <a href="#">CP011979.1</a> |                | 20 222          | Cloacin             | ParE1                  |                                | <i>Δbla</i> <sub>TEM-1</sub>                              |             | <i>Klebsiella pneumoniae</i> DMC1097                | USA               |
| 22 | pUHKPC33-13.841kb            | <a href="#">CP011993.1</a> |                | 13 841          | Cloacin             | ParE <sub>1</sub>      |                                | <i>aac6'-lb-Tn3</i>                                       |             | <i>Klebsiella pneumoniae</i> UHKPC33                | USA               |
| 23 | AR_0024 plasmid unitig_1     | <a href="#">CP026710.1</a> |                | 9 294           | Cloacin             | ParE1                  |                                |                                                           |             | <i>Citrobacter koseri</i> strain AR_0024            | USA               |
| 24 | p500_1420-13.838kb           | <a href="#">CP011984.1</a> |                | 13 838          | Cloacin             | ParE1                  |                                | <i>aac6'-lb-Tn3</i>                                       |             | <i>Klebsiella pneumoniae</i> 500_1420               | USA               |
| 25 | pMNCRE78_1                   | <a href="#">CP018431.1</a> |                | 18 890          | Cloacin             | ParE <sub>1</sub>      |                                | <i>aac6'-lb-Tn3</i>                                       |             | <i>Klebsiella pneumoniae</i> strain MNCRE78         | USA               |
| 26 | pKPN-c8b                     | <a href="#">CP009778.1</a> |                | 15 271          | Cloacin             | ParE1                  |                                | <i>aac6'-lb-Tn3</i>                                       |             | <i>Klebsiella pneumoniae</i> strain KPNIH32         | USA               |
| 27 | pCR14_4                      | <a href="#">CP015396.1</a> | IncFII         | 110 092         | Cloacin             | ParE <sub>1</sub>      |                                | <i>aac6'-lb-Tn3</i>                                       |             | <i>Klebsiella pneumoniae</i> strain CR14            | USA               |
| 28 | KP30835 plasmid unnamed3     | <a href="#">CP027698.1</a> |                | 9 291           | Cloacin             | ParE1                  |                                |                                                           |             | <i>Klebsiella pneumoniae</i> strain KP30835         | USA               |
| 29 | pAAC154                      | <a href="#">JF828150.1</a> |                | 15 101          | Cloacin             | ParE <sub>1</sub>      |                                | <i>aac6'-lb-Tn3</i>                                       |             | <i>Klebsiella pneumoniae</i> strain U3156199        | Israel            |
| 30 | pCN1_2                       | <a href="#">CP015384.1</a> |                | 15 100          | Cloacin             | ParE1                  |                                | <i>aac6'-lb-Tn3</i>                                       |             | <i>Klebsiella pneumoniae</i> strain CN1             | USA               |
| 31 | pBK13043-3                   | <a href="#">CP020840.1</a> |                | 11984           | Δ Cloacin           | ParE <sub>1</sub>      |                                | <i>aac6'-lb-Tn3</i>                                       |             | <i>Klebsiella pneumoniae</i> strain BK13043         | USA               |
| 32 | AR_0053 plasmid unitig_4     | <a href="#">CP021779.1</a> |                | 15 028          | Cloacin             | ParE1                  |                                | <i>aac6'-lb-Tn3</i>                                       |             | <i>Enterobacter cloacae</i> strain AR_0053          | USA               |
| 33 | AR_0009 plasmid tig000000054 | <a href="#">CP024884.1</a> |                | 9 294           | Cloacin             | ParE <sub>1</sub>      |                                |                                                           |             | <i>Klebsiella aerogenes</i> strain AR_0009          | USA               |
| 34 | pAUSMDU8119-1                | <a href="#">CP025009.1</a> | IncFIIK        | 176 049         | Cloacin             | ParE1                  |                                | <i>aac6'-lb-Tn3</i>                                       |             | <i>Klebsiella pneumoniae</i> strain AUSMDU00008119  | Australia         |
| 35 | pKPN-294                     | <a href="#">CP008832.1</a> |                | 13 841          | Cloacin             | ParE <sub>1</sub>      |                                | <i>aac6'-lb-Tn3</i>                                       |             | <i>Klebsiella pneumoniae</i> KPR0928                | USA               |
| 36 | pNJST258C2                   | <a href="#">CP006919.1</a> |                | 25 284          | Cloacin             | ParE1                  |                                | <i>aac6'-lb-Tn3</i> , <i>bla</i> <sub>KPC-3</sub>         |             | <i>Klebsiella pneumoniae</i> 30684/NJST258_2        | USA               |
| 37 | AR0115 plasmid tig00000005   | <a href="#">CP020075.1</a> |                | 22 062          | Cloacin             | ParE1                  |                                | <i>bla</i> <sub>TEM-1</sub> , <i>bla</i> <sub>KPC-3</sub> |             | <i>Klebsiella pneumoniae</i> strain AR_0115         | USA               |
| 38 | ColE-LS6                     | <a href="#">JX442973.1</a> |                | 14 709          | Cloacin             | ParE <sub>1</sub>      |                                | <i>aac6'-lb-Tn3</i>                                       |             | <i>Klebsiella pneumoniae</i>                        | Italia            |
| 39 | AR0117 plasmid unitig_5      | <a href="#">CP020066.1</a> | IncN           | 72 663          | Cloacin             | ParE1                  |                                | <i>aac6'-lb-Tn3</i> , <i>bla</i> <sub>KPC-3</sub>         |             | <i>Klebsiella pneumoniae</i> strain AR_0117         | USA               |
| 40 | pCAV1217-9294                | <a href="#">CP018672.1</a> |                | 9 294           | Cloacin             | ParE <sub>1</sub>      |                                |                                                           |             | <i>Klebsiella pneumoniae</i> strain CAV1217         | USA               |
| 41 | p34618-13.841kb              | <a href="#">CP010394.1</a> |                | 13 841          | Cloacin             | ParE1                  |                                | <i>aac6'-lb-Tn3</i>                                       |             | <i>Klebsiella pneumoniae</i> strain 34618           | USA               |

|                             |                            |        |         |                   |                                                            |                                                   |              |
|-----------------------------|----------------------------|--------|---------|-------------------|------------------------------------------------------------|---------------------------------------------------|--------------|
| 42 pEA1509_B                | <a href="#">FO203353.1</a> | 9 294  | Cloacin | ParE <sub>1</sub> |                                                            | <i>Klebsiella aerogenes</i> EA1509E               | France       |
| 43 pKp_Goe_917-4            | <a href="#">CP018445.1</a> | 9 294  | Cloacin | ParE <sub>1</sub> |                                                            | <i>Klebsiella pneumoniae</i> strain Kp_Goe_822917 | Germany      |
| 44 pNJST258N4               | <a href="#">CP006928.1</a> | 14 249 | Cloacin | ParE <sub>1</sub> | <i>bla</i> <sub>TEM-1</sub>                                | <i>Klebsiella pneumoniae</i> 30660/NJST258_1      | USA          |
| 45 pUHKPC07-13.841kb        | <a href="#">CP011988.1</a> | 13 841 | Cloacin | ParE <sub>1</sub> | <i>aac6'-lb</i> -Tn3                                       | <i>Klebsiella pneumoniae</i> UHKPC07              | USA          |
| 46 RCS12TR533               | <a href="#">LT985216.1</a> | 14 248 | Cloacin | ParE <sub>1</sub> | <i>bla</i> <sub>TEM-3</sub>                                | <i>Escherichia coli</i> strain 533                | France       |
| 47 Ea18A UFPE plasmid       | <a href="#">MG786902.1</a> | 9 453  | Cloacin | ParE <sub>1</sub> |                                                            | <i>Enterobacter cloacae</i> strain Ea18A UFPE     | Brazil       |
| 48 FDAARGOS_287 plasmid 2   | <a href="#">CP022075.2</a> | 9 293  | Cloacin | ParE <sub>1</sub> |                                                            | <i>Citrobacter koseri</i> strain FDAARGOS_287     | USA          |
| 49 FDAARGOS_393 plasmid     | <a href="#">CP023528.1</a> | 9 195  | Cloacin | ParE <sub>1</sub> |                                                            | <i>Citrobacter koseri</i> strain FDAARGOS_393     | USA          |
| 50 p18-43_04                | <a href="#">CP023557.1</a> | 9 293  | Cloacin | ParE <sub>1</sub> |                                                            | <i>Klebsiella pneumoniae</i> ST2017:950142398     | South Africa |
| 51 RCS49_pIV                | <a href="#">LT985257.1</a> | 20 798 | Cloacin | ParE <sub>1</sub> | <i>bla</i> <sub>TEM-1</sub> , <i>bla</i> <sub>SHV-12</sub> | <i>Escherichia coli</i> strain 580                | France       |
| 52 JM45 plasmid p2          | <a href="#">CP006658.1</a> | 12 207 | Cloacin | ParE <sub>1</sub> | <i>retA</i>                                                | <i>Klebsiella pneumoniae</i> JM45                 | china        |
| 53 pMRSN480738_10.0         | <a href="#">CP024463.1</a> | 10 046 | Cloacin | ParE <sub>1</sub> |                                                            | <i>Klebsiella pneumoniae</i> strain QS17-0161     | Thailand     |
| 54 AR_0079 plasmid unnamed3 | <a href="#">CP028998.1</a> | 10 077 | Cloacin | ParE <sub>2</sub> | <i>tolA</i> , <i>copG</i>                                  | <i>Klebsiella pneumoniae</i> strain AR_0079       | USA          |
| 55 KP36 plasmid 3           | <a href="#">CP017388.1</a> | 10 077 | Cloacin | ParE <sub>2</sub> | <i>tolA</i> , <i>copG</i>                                  | <i>Klebsiella pneumoniae</i> strain KP36          | Taiwan       |
| 56 FDAARGOS_444 plasmid 3   | <a href="#">CP023944.1</a> | 10 061 | Cloacin | ParE <sub>2</sub> | <i>tolA</i> , <i>copG</i>                                  | <i>Klebsiella pneumoniae</i> strain FDAARGOS_444  | Canada       |
| 57 p69-3                    | <a href="#">CP025459.1</a> | 10 060 | Cloacin | ParE <sub>2</sub> | <i>tolA</i> , <i>copG</i>                                  | <i>Klebsiella pneumoniae</i> strain KP69          | China        |
| 58 p10K_L111                | <a href="#">CP030130.1</a> | 10 060 | Cloacin | ParE <sub>2</sub> | <i>tolA</i> , <i>copG</i>                                  | <i>Klebsiella pneumoniae</i> strain 160111        | Taiwan       |
| 59 p1_020079                | <a href="#">CP029379.1</a> | 11 970 | Cloacin | ParE <sub>2</sub> | <i>tolA</i> , <i>copG</i> , <i>retA</i>                    | <i>Klebsiella pneumoniae</i> strain SCKP020079    | China        |
| 60 p1_095649                | <a href="#">CP026582.2</a> | 10 060 | Cloacin | ParE <sub>2</sub> | <i>tolA</i> , <i>copG</i>                                  | <i>Klebsiella pneumoniae</i> strain WCHKP649      | China        |
| 61 p2_020036                | <a href="#">CP028580.1</a> | 12 746 | Cloacin | ParE <sub>2</sub> | <i>tolA</i> , <i>copG</i> , <i>retA</i>                    | <i>Klebsiella pneumoniae</i> strain WCHKP36       | China        |
| 62 p5-L388                  | <a href="#">CP029224.1</a> | 11 970 | Cloacin | ParE <sub>2</sub> | <i>tolA</i> , <i>copG</i> , <i>retA</i>                    | <i>Klebsiella pneumoniae</i> strain L388          | China        |
| 63 pGSU10-3-4               | <a href="#">AP018675.1</a> | 10 061 | Cloacin | ParE <sub>2</sub> | <i>tolA</i> , <i>copG</i>                                  | <i>Klebsiella pneumoniae</i> GSU10-3              | japon        |

\*aac6'-lb, Tn3: Tn1331 derivative

\*\*CopG: ribbon-helix-helix protein, CopG family; retA: (group II intron reverse transcriptase/maturase); TolA: cell envelope integrity protein

Table S9. Characteristics of the MOB<sub>RNA</sub> type 5 plasmids

| No | Plasmid ID                    | Accession no               | Co-integration | Plasmid size bp | Colicin operon type | Toxin/antitoxin system | Restriction/methylation system | antibiotic resistance gene | other genes                                                | Bacterial host ID                                                                  | Geographic origin |
|----|-------------------------------|----------------------------|----------------|-----------------|---------------------|------------------------|--------------------------------|----------------------------|------------------------------------------------------------|------------------------------------------------------------------------------------|-------------------|
| 1  | p9705                         | <a href="#">AB040037.1</a> |                | 3 172           |                     |                        |                                |                            |                                                            | <i>Escherichia coli</i> O157:H7                                                    | Japon             |
| 2  | pCRP3                         | <a href="#">AF311902.1</a> |                | 3 172           |                     |                        |                                |                            |                                                            | <i>Citrobacter rodentium</i> strain DBS100 pl                                      | USA               |
| 3  | pSS046_spB                    | <a href="#">CP000642.1</a> |                | 5 153           | Colicin E1          |                        |                                |                            |                                                            | <i>Shigella sonnei</i> Ss046                                                       | China             |
| 4  | pHUSEC41-4                    | <a href="#">HE603113.1</a> |                | 5 153           | Colicin E1          |                        |                                |                            |                                                            | <i>Escherichia coli</i> HUSEC41 O104:H4                                            | Germany           |
| 5  | pCoIE1-H22                    | <a href="#">AY913943.1</a> |                | 5 159           | Colicin E1          |                        |                                |                            |                                                            | <i>Escherichia coli</i> strain H22                                                 | Brazil            |
| 6  | pCFSAN030807_5                | <a href="#">CP023650.1</a> |                | 5 153           | Colicin E1          |                        |                                |                            |                                                            | <i>Shigella sonnei</i> strain CFSAN030807                                          | USA               |
| 7  | FHI29 scaffold-5              | <a href="#">LM995843.1</a> |                | 6 815           | Colicin B           | ParE3                  |                                |                            |                                                            | <i>Escherichia coli</i> genome assembly FHI29                                      | Norway            |
| 8  | 53G plasmid B                 | <a href="#">HE616530.1</a> |                | 5 153           | Colicin E1          |                        |                                |                            |                                                            | <i>Shigella sonnei</i> 53G                                                         | ?                 |
| 9  | RCS93_pIV                     | <a href="#">LT985308.1</a> |                | 4 913           | Colicin E1          |                        |                                |                            |                                                            | <i>Escherichia coli</i> strain CIP106223                                           | United Kingdom    |
| 10 | FHI74 scaffold-12             | <a href="#">LM996601.1</a> | IncFIB -ΔFII   | 55 304          |                     |                        |                                |                            |                                                            | <i>Escherichia coli</i> genome assembly FHI74                                      | Norway            |
| 11 | plasmid p3                    | <a href="#">CP023374.1</a> |                | 3 173           |                     |                        |                                |                            |                                                            | <i>Escherichia coli</i> strain 1283                                                | United Kingdom    |
| 12 | pO104:H7_S3                   | <a href="#">KM085453.1</a> |                | 3 173           |                     |                        |                                |                            |                                                            | <i>Escherichia coli</i> O104:H7 strain RM9387                                      | USA               |
| 13 | pEC34A                        | <a href="#">HQ622575.1</a> |                | 3 770           |                     |                        |                                |                            |                                                            | <i>Escherichia coli</i> strain NCTC 9034                                           | Poland            |
| 14 | RCS64_Pi                      | <a href="#">LT985294.1</a> |                | 3 002           |                     | ParE3                  |                                |                            |                                                            | <i>Escherichia coli</i> strain 650                                                 | France            |
| 15 | FHI4 scaffold-7               | <a href="#">LM995913.1</a> |                | 4 147           |                     |                        |                                |                            | rrt*                                                       | <i>Escherichia coli</i> genome assembly FHI4                                       | Norway            |
| 16 | plasmid I                     | <a href="#">AF218051.1</a> |                | 4 053           |                     |                        |                                |                            | rrt*, csp**                                                | <i>Salmonella enterica</i> serovar enteritidis strain 2159                         | Czech Republic    |
| 17 | AR435 plasmid unnamed8        | <a href="#">CP029121.1</a> |                | 3 174           |                     |                        |                                |                            |                                                            | <i>Escherichia coli</i> strain AR435                                               | USA               |
| 18 | pB1020                        | <a href="#">JQ319772.1</a> |                | 3 174           |                     |                        |                                |                            |                                                            | <i>Klebsiella pneumoniae</i> strain BB1089                                         | Spain             |
| 19 | pCARB35_05                    | <a href="#">CP031658.1</a> |                | 3 174           |                     |                        |                                |                            |                                                            | <i>Escherichia coli</i> strain UK_Dog_Liverpool                                    | United Kingdom    |
| 20 | pV044-c                       | <a href="#">LC056177.1</a> |                | 2 607           |                     |                        |                                |                            |                                                            | <i>Escherichia coli</i> strain V044                                                | India             |
| 21 | Nissle 1917                   | <a href="#">CP007799.1</a> | chromosome     |                 |                     |                        |                                |                            |                                                            | <i>Escherichia coli</i> Nissle 1917                                                | Germany           |
| 22 | pYU39_2.7                     | <a href="#">CP011435.1</a> |                | 2 677           |                     |                        |                                |                            |                                                            | <i>Salmonella enterica</i> serovar Typhimurium strain YU39                         | Mexico            |
| 23 | pSAN2-1677                    | <a href="#">CP019897.1</a> |                | 3 126           |                     |                        |                                |                            |                                                            | <i>Salmonella enterica</i> serovar Anatum str. USDA-ARS-USMARC-1677 isolate SAN222 | USA               |
| 24 | p2.3                          | <a href="#">KU166868.1</a> |                | 3 609           |                     |                        |                                |                            | cholin binding                                             | <i>Salmonella enterica</i> serovar Enteritidis strain S1080                        | Russia            |
| 25 | CFSAN001921 plasmid           | <a href="#">CP006052.1</a> |                | 3 609           |                     |                        |                                |                            | cholin binding                                             | <i>Salmonella enterica</i> serovar Typhimurium var. 5- str. CFSAN001921            | USA               |
| 26 | p75-02_7                      | <a href="#">CP019695.1</a> |                | 2 690           |                     |                        |                                |                            |                                                            | <i>Shigella sonnei</i> strain 75/02                                                | Hungary           |
| 27 | pCFSAN030807_8                | <a href="#">CP023653.1</a> |                | 2 690           |                     |                        |                                |                            |                                                            | <i>Shigella sonnei</i> strain CFSAN030807                                          | USA               |
| 28 | FDAARGOS_448 plasmid unnamed4 | <a href="#">CP023958.1</a> |                | 3 264           |                     |                        |                                |                            |                                                            | <i>Escherichia coli</i> strain FDAARGOS_448                                        | USA               |
| 29 | pSL491_3                      | <a href="#">CP001149.1</a> |                | 3 176           |                     |                        |                                |                            |                                                            | <i>Salmonella enterica</i> serovar Virchow str. SL491                              | USA               |
| 30 | p3K                           | <a href="#">CP007488.1</a> |                | 3 208           |                     |                        |                                |                            | <i>aph(3)-I</i>                                            | <i>Salmonella enterica</i> subsp. enterica strain SA972816                         | China             |
| 31 | pU302S                        | <a href="#">AY333433.1</a> |                | 3 208           |                     |                        |                                |                            | <i>aph(3)-I</i>                                            | <i>Salmonella enterica</i> serovar typhimurium                                     | USA               |
| 32 | pec22                         | <a href="#">HQ848325.1</a> |                | 11 957          |                     |                        | Eco22T1 type II                |                            |                                                            | <i>Escherichia coli</i> strain TB22                                                | Poland            |
| 33 | p4821                         | <a href="#">Y14016.1</a>   |                | 3 307           |                     | LsoA/B                 |                                |                            |                                                            | <i>Escherichia coli</i> O157:H7                                                    | Germany           |
| 34 | pOSAK1                        | <a href="#">AB011548.2</a> |                | 3 306           |                     | LsoA/B                 |                                |                            |                                                            | <i>Escherichia coli</i> O157:H7 str. Sakai                                         | Japon             |
| 35 | pN13-01290_3-1                | <a href="#">CP012933.1</a> |                | 3 319           |                     | LsoA/B                 |                                |                            |                                                            | <i>Salmonella enterica</i> serovar Heidelberg strain N13-01290                     | Canada            |
| 36 | NTP16                         | <a href="#">L05392.1</a>   |                | 8 255           |                     | LsoA/B                 |                                |                            | <i>aph(3)-I bla</i> <sub>TEM-1</sub> variant               | <i>Salmonella enterica</i> serovar Typhimurium                                     | United Kingdom    |
| 37 | p1PCN033                      | <a href="#">CP006633.1</a> |                | 3 319           |                     | LsoA/B                 |                                |                            |                                                            | <i>Escherichia coli</i> PCN033                                                     | China             |
| 38 | pCERC7                        | <a href="#">KX356458.1</a> |                | 9 712           |                     | LsoA/B                 |                                |                            | <i>bla</i> <sub>TEM-1</sub>                                | <i>Escherichia coli</i> strain 11.1-R1 ST131                                       | Australia         |
| 39 | pST12                         | <a href="#">HG428760.1</a> |                | 8 275           |                     | LsoA/B                 |                                |                            | <i>bla</i> <sub>TEM-144</sub> ESBL                         | <i>Salmonella enterica</i> serovar Derby str. T12                                  | Uruguay           |
| 40 | pAnkS                         | <a href="#">DQ916413.1</a> |                | 8 271           |                     | LsoA/B                 |                                |                            | <i>bla</i> <sub>TEM-1</sub>                                | <i>Salmonella enterica</i> serovar typhimurium                                     | Turkey            |
| 41 | RCS35_pII                     | <a href="#">LT985233.1</a> |                | 14 365          |                     | LsoA/B                 |                                |                            | <i>bla</i> <sub>SHV-12</sub> , <i>bla</i> <sub>TEM-1</sub> | <i>Escherichia coli</i> strain 565                                                 | France            |
| 42 | pEco70745_3                   | <a href="#">CP023261.1</a> |                | 3 735           |                     |                        |                                |                            | cholin binding                                             | <i>Escherichia coli</i> strain CCUG 70745                                          | Sweden            |
| 43 | pV147-c                       | <a href="#">LC056399.1</a> |                | 1 922           |                     |                        |                                |                            |                                                            | <i>Escherichia coli</i> strain V147                                                | India             |

|    |                               |                            |        |        |                                                            |                                               |        |
|----|-------------------------------|----------------------------|--------|--------|------------------------------------------------------------|-----------------------------------------------|--------|
| 44 | pV263-c                       | <a href="#">LC056464.1</a> | 2 271  |        |                                                            | <i>Escherichia coli</i> strain V263           | India  |
| 45 | FDAARGOS_433 plasmid unnamed8 | <a href="#">CP023904.1</a> | 4 011  | AbiEii |                                                            | <i>Escherichia coli</i> strain FDAARGOS_433   | USA    |
| 46 | RCS48_pII                     | <a href="#">LT985247.1</a> | 19 831 | LsoA/B | <i>bla</i> <sub>SHV-12</sub> , <i>bla</i> <sub>TEM-1</sub> | <i>Escherichia coli</i> strain 720            | France |
| 47 | FHI85 scaffold-7              | <a href="#">LM996934.1</a> | 3 741  |        |                                                            | <i>Escherichia coli</i> genome assembly FHI85 | Norway |
| 48 | pEC404/03-4                   | <a href="#">AP014807.1</a> | 8 599  |        | <i>bla</i> <sub>TEM-1</sub>                                | <i>Escherichia coli</i> O119:H6               | Brazil |

\*rrtI: retron reverse transcriptase

\*\*cps: cold shock gene

**Table S10. Characteristics of the RelN<sub>RNA</sub> type1 plasmids**

| No | Plasmid ID            | Accession no                                             | Co-integration | Plasmid size bp | Colicin operon type | Toxin/antitoxin system | Restriction/methylation system | antibiotic resistance gene                                          | other genes | Bacterial host ID                                              | Geographic origin |
|----|-----------------------|----------------------------------------------------------|----------------|-----------------|---------------------|------------------------|--------------------------------|---------------------------------------------------------------------|-------------|----------------------------------------------------------------|-------------------|
| 1  | FDAARGOS_434 unnamed  | <a href="#">CP023872.1</a>                               |                | 6 172           |                     | MazE                   |                                | <i>suL2</i> , <i>APH(3'')-Ib</i> , <i>APH(6)</i>                    |             | <i>Escherichia coli</i> strain FDAARGOS_434                    | Canada            |
| 2  | pCFSAN030807_2        | <a href="#">CP023647.1</a>                               |                | 8 401           |                     | MazE                   |                                | <i>suL2</i> , <i>tet(A)</i> , <i>APH(3'')-Ib</i> , <i>APH(6)-Id</i> |             | <i>Shigella sonnei</i> strain CFSAN030807                      | usa               |
| 3  | FDAARGOS_90 unnamed4  | <a href="#">CP014100.1</a>                               |                | 8 421           |                     | MazE                   |                                | <i>strA/B</i> , <i>suL2</i> , <i>tet(A)</i>                         |             | <i>Shigella sonnei</i> strain FDAARGOS_90                      | USA               |
| 4  | FHI72 scaffold-18     | <a href="#">LM996860.1</a>                               |                | 8 420           |                     | MazE                   |                                | <i>strA/B</i> , <i>suL2</i> , <i>tet(A)</i>                         |             | <i>Escherichia coli</i> genome assembly FHI72                  | Norway            |
| 5  | p62                   | <a href="#">FN822747.1</a>                               |                | 6 222           |                     | MazE                   |                                | <i>strA/B</i> , <i>suL2</i>                                         |             | <i>Escherichia coli</i> ETEC 1392/75                           | Honk Kong         |
| 6  | p9123 plasmid family  | <a href="#">AY360321.1</a>                               |                | 6 222           |                     | MazE                   |                                | <i>strA/B</i> , <i>suL2</i>                                         |             | <i>Escherichia coli</i>                                        | United Kingdom    |
| 7  | p6148/pE2348-2        | <a href="#">EU580136.1</a><br><a href="#">FM180570.1</a> |                | 6 147           |                     | MazE                   |                                | <i>strA/B</i> , <i>suL2</i>                                         |             | <i>Escherichia coli</i> strain E2348/69 0127:H6                | United Kingdom    |
| 8  | pQ1-1                 | <a href="#">HM371192.1</a>                               |                | 6 200           |                     | MazE                   |                                | <i>strA/B</i> , <i>suL2</i>                                         |             | <i>Escherichia coli</i> strain Q1                              | China             |
| 9  | pCERC2                | <a href="#">KX291024.1</a>                               |                | 6 200           |                     | MazE                   |                                | <i>strA/B</i> , <i>suL2</i>                                         |             | <i>Escherichia coli</i> strain 10.1-R1                         | Australia         |
| 10 | pEC299-4              | <a href="#">JX238460.1</a>                               |                | 6 199           |                     | MazE                   |                                | <i>strA/B</i> , <i>suL2</i>                                         |             | <i>Escherichia coli</i> strain EC299                           | Sweden            |
| 11 | C2 plasmid A          | <a href="#">CP010118.1</a>                               |                | 8 410           |                     | MazE                   |                                | <i>strA/B</i> , <i>suL2</i> , <i>tet(A)</i>                         |             | <i>Escherichia coli</i> strain C2                              | China             |
| 12 | FDAARGOS_90 unnamed5  | <a href="#">CP014101.1</a>                               |                | 8 420           |                     | MazE                   |                                | <i>strA/B</i> , <i>suL2</i> , <i>tet(A)</i>                         |             | <i>Shigella sonnei</i> strain FDAARGOS_90                      | USA               |
| 13 | pCN061p3              | <a href="#">CP006639.1</a>                               |                | 6 222           |                     | MazE                   |                                | <i>strA/B</i> , <i>suL2</i>                                         |             | <i>Escherichia coli</i> PCN061                                 | China             |
| 14 | pMG828-5              | <a href="#">DQ995355.1</a>                               |                | 8 985           |                     | MazE                   |                                | <i>suL2</i> , <i>bla</i> <sub>AMPc</sub>                            |             | <i>Escherichia coli</i>                                        | Taiwan            |
| 15 | RCS98                 | <a href="#">LT985316.1</a>                               |                | 6 200           |                     | MazE                   |                                | <i>strA/B</i> , <i>suL2</i>                                         |             | <i>Escherichia coli</i> strain ECOR 17                         | Indonesia         |
| 16 | pABC-3                | <a href="#">KT988306.1</a>                               |                | 6 779           |                     | MazE                   |                                | <i>strA/B</i> , <i>suL2</i> , <i>dfrA14</i>                         |             | <i>Shigella sonnei</i> strain c8225                            | Chili             |
| 17 | pSS046_spA            | <a href="#">CP000641.1</a>                               |                | 8 420           |                     | MazE                   |                                | <i>strA/B</i> , <i>suL2</i> , <i>tet(A)</i>                         |             | <i>Shigella sonnei</i> strain Ss046                            | China             |
| 18 | RCS86_pl              | <a href="#">LT985307.1</a>                               |                | 6 069           |                     | MazE                   |                                | <i>suL2</i>                                                         |             | <i>Escherichia coli</i> strain ECOR 4                          | USA               |
| 19 | pSFxv 3               | <a href="#">CP001386.1</a>                               |                | 6 200           |                     | MazE                   |                                | <i>strA/B</i> , <i>suL2</i>                                         |             | <i>Shigella flexneri</i> 2002017                               | China             |
| 20 | WCHEC005237 p1_005237 | <a href="#">CP026572.1</a>                               |                | 6 200           |                     | MazE                   |                                | <i>suL2</i> , <i>APH(3'')-Ib</i> , <i>APH(6)-Id</i>                 |             | <i>Escherichia coli</i> strain WCHEC005237                     | China             |
| 21 | pKKTET7               | <a href="#">AF497970.1</a>                               |                | 8 400           |                     | MazE                   |                                | <i>strA/B</i> , <i>suL2</i> , <i>tet(A)</i>                         |             | <i>Shigella sonnei</i>                                         | South Korea       |
| 22 | pVI678                | <a href="#">EF090911.1</a>                               |                | 6 222           |                     | MazE                   |                                | <i>strA/B</i> , <i>suL2</i>                                         |             | <i>Escherichia coli</i>                                        | Norway            |
| 23 | pETEC_6               | <a href="#">CP000798.1</a>                               |                | 6 199           |                     | MazE                   |                                | <i>strA/B</i> , <i>suL2</i>                                         |             | <i>Escherichia coli</i> E24377A                                | USA               |
| 24 | p12579_4              | <a href="#">CP003113.1</a>                               |                | 6 211           |                     | MazE                   |                                | <i>strA/B</i> , <i>suL2</i>                                         |             | <i>Escherichia coli</i> O55:H7 str. RM12579                    | USA               |
| 25 | p8401                 | <a href="#">CP012198.1</a>                               |                | 8 401           |                     | MazE                   |                                | <i>strA/B</i> , <i>suL2</i> , <i>tet(A)</i>                         |             | <i>Escherichia coli</i> strain ECwhn14                         | China             |
| 26 | pFORC11.3             | <a href="#">CP010832.1</a>                               |                | 8 405           |                     | MazE                   |                                | <i>strA/B</i> , <i>suL2</i> , <i>tet(A)</i>                         |             | <i>Shigella sonnei</i> strain FORC_011                         | South Korea       |
| 27 | RCS63                 | <a href="#">LT985269.1</a>                               |                | 22 308          |                     | MazE                   |                                | <i>strA/B</i> , <i>suL2</i> , <i>bla</i> <sub>CTX-M-14</sub>        |             | <i>Escherichia coli</i> strain 631                             | France            |
| 28 | pSS4                  | <a href="#">AF534183.1</a>                               |                | 8 401           |                     | MazE                   |                                | <i>strA/B</i> , <i>suL2</i> , <i>tet(A)</i>                         |             | <i>Shigella sonnei</i>                                         | South Korea       |
| 29 | RCS92_pl              | <a href="#">LT985314.1</a>                               |                | 6 222           |                     | MazE                   |                                | <i>strA/B</i> , <i>suL2</i>                                         |             | <i>Escherichia coli</i> strain ECOR 25                         | USA               |
| 30 | 1283 p7               | <a href="#">CP023375.1</a>                               |                | 6 800           |                     | MazE                   |                                | <i>suL2</i> , <i>DfrA14</i> , <i>APH(6)-Id</i>                      |             | <i>Escherichia coli</i> strain 1283                            | United Kingdom    |
| 31 | pCERC1                | <a href="#">JN012467.1</a>                               |                | 6 790           |                     | MazE                   |                                | <i>strA/B</i> , <i>suL2</i> , <i>dfrA14</i>                         |             | <i>Escherichia coli</i> strain S1.2.T2R                        | Australia         |
| 32 | pT108                 | <a href="#">JN412137.1</a>                               |                | 9 007           |                     | MazE                   |                                | <i>suL2</i> , <i>bla</i> <sub>AMPc</sub>                            |             | <i>Escherichia coli</i> strain 108                             | Thailand          |
| 33 | RCS87                 | <a href="#">LT985298.1</a>                               |                | 6 047           |                     | MazE                   |                                | <i>suL2</i>                                                         |             | <i>Escherichia coli</i> strain ECOR 18                         | USA               |
| 34 | SA20084699 unnamed2   | <a href="#">CP022499.1</a>                               | IncQ           | 38 945          |                     | MazE                   |                                | <i>suL2</i> , <i>DfrA14</i> , <i>APH(3'')</i> , <i>APH(6)-Id</i>    |             | <i>Salmonella enterica</i> serovar Manhattan strain SA20084699 | Canada            |
| 35 | pRF1                  | <a href="#">AB076707.2</a>                               |                | 6 066           |                     | MazE                   |                                | <i>suL2</i>                                                         |             | <i>Salmonella enterica</i> serovar Choleraesuis                | Japon             |

Table S11. Characteristics of the Rel<sub>RNA</sub> type 2 plasmids

| No | Plasmid ID                    | Accession no               | Co-integration | Plasmid size bp | Colicin operon type | Toxin/antitoxin system | Restriction/methylation system | antibiotic resistance gene                 | other genes | Bacterial host ID                                               | Geographic origin |
|----|-------------------------------|----------------------------|----------------|-----------------|---------------------|------------------------|--------------------------------|--------------------------------------------|-------------|-----------------------------------------------------------------|-------------------|
| 1  | pCol-let                      | <a href="#">AF197335.1</a> |                | 5 847           | Colicin Y           |                        |                                |                                            |             | <i>Escherichia coli</i>                                         | USA               |
| 2  | pCuv8 clone                   | <a href="#">MG648905.1</a> |                | 4 000           |                     | HigA/B                 |                                |                                            |             | <i>Escherichia coli</i>                                         | France            |
| 3  | RCS83_pII                     | <a href="#">LT985291.1</a> |                | 2 999           |                     | HigA/B                 |                                |                                            |             | <i>Escherichia coli</i> strain ECOR 10                          | USA               |
| 4  | M10 plasmid E                 | <a href="#">CP010205.1</a> |                | 3 258           |                     | HigA/B                 |                                |                                            |             | <i>Escherichia coli</i> strain M10                              | China             |
| 5  | pEC886                        | <a href="#">HQ659758.1</a> |                | 9 261           |                     |                        | ecoVIII type II                | <i>bla</i> <sub>TEM-1</sub>                |             | <i>Escherichia coli</i> strain 886                              | Poland            |
| 6  | pEC156                        | <a href="#">AF158026.1</a> |                | 4 312           |                     |                        | ecoVIII type II                |                                            |             | <i>Escherichia coli</i>                                         | ?                 |
| 7  | pEC71-2                       | <a href="#">JX238450.1</a> |                | 4 315           |                     |                        | ecoVIII type II                |                                            |             | <i>Escherichia coli</i> strain EC71                             | Sweden            |
| 8  | pEC881_6                      | <a href="#">CP019023.1</a> |                | 3 256           |                     | HigA/B                 |                                |                                            |             | <i>Escherichia coli</i> strain EcoI_881                         | Colombia          |
| 9  | pColG                         | <a href="#">DQ286390.1</a> |                | 4 715           |                     | AbiEii/Gii             |                                |                                            |             | <i>Escherichia coli</i> strain CA46                             | Slovenia          |
| 10 | FDAARGOS_313 plasmid unnamed3 | <a href="#">CP022068.1</a> |                | 19 849          |                     | HigA/B                 |                                | <i>bla</i> <sub>TEM-1</sub>                |             | <i>Salmonella enterica</i> strain FDAARGOS_313                  | USA               |
| 11 | pD90-4                        | <a href="#">CP022454.1</a> |                | 17 636          |                     | AbiEii/Gii             |                                |                                            |             | <i>Salmonella enterica</i> serovar Indiana strain D90           | China             |
| 12 | pC06114_8                     | <a href="#">CP016042.1</a> |                | 3 205           |                     |                        |                                |                                            |             | <i>Escherichia coli</i> isolate Co6114                          | Germany           |
| 13 | pNMEC-O75B                    | <a href="#">CP030113.1</a> |                | 6 465           |                     | ToxN/AbiQ              |                                |                                            |             | <i>Escherichia coli</i> strain MCJCHV-1                         | USA               |
| 14 | AR_452 plasmid unnamed3       | <a href="#">CP030330.1</a> |                | 6 395           |                     | ToxN/AbiQ              |                                |                                            |             | <i>Escherichia coli</i> strain AR_452                           | USA               |
| 15 | pO26_4                        | <a href="#">AP010957.1</a> |                | 4 073           |                     |                        |                                |                                            |             | <i>Escherichia coli</i> O26:H11 str. 11368                      | Japan             |
| 16 | pO26-S3                       | <a href="#">FJ004637.1</a> |                | 4 073           |                     |                        |                                |                                            |             | <i>Escherichia coli</i> strain H30 serovar O26:H11              | USA               |
| 17 | MS6671_plasmid_D              | <a href="#">LN824137.1</a> |                | 4 715           |                     | AbiEii/Gii             |                                |                                            |             | <i>Klebsiella pneumoniae</i> genome assembly MS6671.v1          | Australia         |
| 18 | p48896_5                      | <a href="#">CP024434.1</a> |                | 4 715           |                     | AbiEii/Gii             |                                |                                            |             | <i>Klebsiella pneumoniae</i> strain DA48896                     | Pakistan          |
| 19 | pSE12-02541                   | <a href="#">KY807920.1</a> |                | 17 156          |                     |                        |                                | <i>bla</i> <sub>TEM-1</sub> , <i>mrc-5</i> |             | <i>Salmonella enterica</i> serovar Paratyphi B isolate 12-02541 | Germany           |
| 20 | pEC1066                       | <a href="#">MG587003.1</a> |                | 12 201          |                     |                        |                                | <i>mrc-5-2</i> variant                     |             | <i>Escherichia coli</i>                                         | Germany           |
| 21 | pEC2380                       | <a href="#">MG587004.1</a> |                | 11 708          |                     |                        |                                | <i>mrc-5-2</i> variant                     |             | <i>Escherichia coli</i>                                         | Germany           |
| 22 | pSE13-SA01718                 | <a href="#">KY807921.1</a> |                | 12 201          |                     |                        |                                | <i>mrc-5</i>                               |             | <i>Salmonella enterica</i> serovar Paratyphi B 13-SA01718       | Germany           |
| 23 | p4.4                          | <a href="#">MG948564.1</a> |                | 6 760           |                     |                        | type III                       |                                            |             | <i>Salmonella enterica</i> serovar Enteritidis strain S17861    | Russia            |
| 24 | RCS92_pIII                    | <a href="#">LT985312.1</a> |                | 3 174           |                     |                        |                                |                                            | <i>fehE</i> | <i>Escherichia coli</i> strain ECOR 25                          | USA               |
| 25 | pO26-S2                       | <a href="#">FJ386570.1</a> |                | 3 174           |                     |                        |                                |                                            | <i>fehE</i> | <i>Escherichia coli</i> strain H30                              | Canada            |
| 26 | pSYM2                         | <a href="#">KM107838.1</a> |                | 4 197           |                     |                        | EcorII-C type II               |                                            |             | <i>Escherichia coli</i> strain G3/10                            | Germany           |
| 27 | pKPN2                         | <a href="#">AF300473.1</a> |                | 4 196           |                     |                        | MKpn2kl type II                |                                            |             | <i>Klebsiella pneumoniae</i>                                    | Russia            |
| 28 | pSe_kan                       | <a href="#">HQ230976.1</a> |                | 7 132           |                     |                        |                                | <i>aphA1</i>                               |             | <i>Salmonella enterica</i> serovar Typhimurium                  | USA               |
| 29 | pSBardo-Kan                   | <a href="#">HQ230977.1</a> |                | 8 198           |                     |                        |                                | <i>aphA1</i>                               |             | <i>Salmonella enterica</i> serovar Bardo                        | USA               |
| 30 | pSFxv_5                       | <a href="#">CP001388.1</a> |                | 3 180           |                     |                        |                                |                                            | <i>fehE</i> | <i>Shigella flexneri</i> 2002017                                | China             |
| 31 | pSF301-2                      | <a href="#">JF813187.1</a> |                | 3 178           |                     |                        |                                |                                            | <i>fehE</i> | <i>Shigella flexneri</i> strain 2a 301                          | China             |
| 32 | p2457TS2                      | <a href="#">AY028316.1</a> |                | 3 179           |                     |                        |                                |                                            | <i>fehE</i> | <i>Shigella flexneri</i> 2a                                     | China             |
| 33 | 2mDa plasmid                  | <a href="#">M25995.1</a>   |                | 3 048           |                     |                        |                                |                                            | <i>fehE</i> | <i>Shigella flexneri</i> 2mDa                                   | USA               |

**Table S12. Characteristics of the Rel<sub>RNA</sub> type 3 plasmids**

| No | Plasmid ID                          | Accession no               | Co-integration | Plasmid size bp | Colicin operon type | Toxin/antitoxin system | Restriction/methylation system | antibiotic resistance gene | other genes           | Bacterial host ID                                      | Geographic origin |
|----|-------------------------------------|----------------------------|----------------|-----------------|---------------------|------------------------|--------------------------------|----------------------------|-----------------------|--------------------------------------------------------|-------------------|
| 1  | pCAV1752-4374                       | <a href="#">CP018358.1</a> |                | 4 374           |                     |                        |                                |                            |                       | <i>Klebsiella oxytoca</i> strain CAV1752               | USA               |
| 2  | pEC542_KPC                          | <a href="#">CP018968.1</a> | IncP-6         | 44 320          |                     |                        |                                |                            |                       | <i>Escherichia coli</i> strain Ecol_542                | Viet Nam          |
| 3  | FDAARGOS_429 plasmid unnamed1       | <a href="#">CP023876.1</a> |                | 10 343          |                     | AbiEii (a)             |                                |                            |                       | <i>Raoultella planticola</i> strain FDAARGOS_429       | Canada            |
| 4  | FDAARGOS_430 plasmid unnamed2       | <a href="#">CP023880.1</a> |                | 10 345          |                     | AbiEii (a)             |                                |                            |                       | <i>Raoultella planticola</i> strain FDAARGOS_430       | Canada            |
| 5  | INF322 plasmid unnamed3             | <a href="#">CP024485.1</a> |                | 4 228           |                     |                        |                                |                            |                       | <i>Klebsiella pneumoniae</i> strain INF322             | Australia         |
| 6  | pKPN2312-5                          | <a href="#">CP011315.1</a> |                | 4 831           |                     | AbiEii (b)             |                                |                            |                       | <i>Klebsiella pneumoniae</i> strain 234-12             | Germany           |
| 7  | KSB1_7F-sc-2280268 plasmid unnamed2 | <a href="#">CP031816.1</a> |                | 4 110           |                     |                        |                                |                            |                       | <i>Klebsiella pneumoniae</i> strain KSB1_7F-sc-2280268 | Australia         |
| 8  | pCAV1042-2781                       | <a href="#">CP018665.1</a> |                | 2 781           |                     |                        |                                |                            |                       | <i>Klebsiella pneumoniae</i> strain CAV1042            | USA               |
| 9  | pMRSN480738_2.8                     | <a href="#">CP024464.1</a> |                | 2 780           |                     |                        |                                |                            |                       | <i>Klebsiella pneumoniae</i> strain QS17-0161          | Thailand          |
| 10 | pKlebB-k17/80                       | <a href="#">AF156893.2</a> |                | 5 258           | <i>klebicin B</i>   |                        |                                |                            |                       | <i>Klebsiella pneumoniae</i>                           | USA               |
| 11 | INF125-sc-2279943 plasmid unnamed2  | <a href="#">CP031797.1</a> |                | 4 269           |                     |                        |                                |                            |                       | <i>Klebsiella pneumoniae</i> strain INF125-sc-2279943  | Australia         |
| 12 | p4_020019                           | <a href="#">CP028552.1</a> |                | 4 686           |                     |                        |                                |                            |                       | <i>Klebsiella variicola</i> strain WCHKP19             | China             |
| 13 | pX39-5                              | <a href="#">CP023982.1</a> |                | 3 374           |                     | MazE                   |                                |                            |                       | <i>Klebsiella variicola</i> strain X39                 | China             |
| 14 | KSB1_5D plasmid unnamed6            | <a href="#">CP024197.1</a> |                | 3 825           |                     | MazE                   |                                |                            |                       | <i>Klebsiella pneumoniae</i> isolate KSB1_5D           | Australia         |
| 15 | H1 plasmid B                        | <a href="#">CP010162.1</a> |                | 4 075           |                     | MazE                   |                                |                            | <i>fepE</i>           | <i>Escherichia coli</i> strain H1 plasmid B            | China             |
| 16 | RCS83_pl                            | <a href="#">LT985290.1</a> |                | 4 074           |                     | MazE                   |                                |                            | <i>fepE</i>           | <i>Escherichia coli</i> strain ECOR 10                 | USA               |
| 17 | pKPN1482-5                          | <a href="#">CP020845.1</a> |                | 9 510           |                     |                        |                                |                            | alcohol dehydrogenase | <i>Klebsiella pneumoniae</i> strain KPN1482            | USA               |
| 18 | p1_095845                           | <a href="#">CP031882.1</a> |                | 5 733           |                     |                        |                                |                            |                       | <i>Klebsiella pneumoniae</i> strain WCHKP095845        | China             |
| 19 | pKP13c                              | <a href="#">CP003995.1</a> |                | 5 065           |                     | AbiEii (a)             |                                |                            |                       | <i>Klebsiella pneumoniae</i> Kp13                      | Brazil            |
| 20 | FDAARGOS_442 plasmid unnamed4       | <a href="#">CP023930.1</a> |                | 4 166           |                     | AbiEii (a)             |                                |                            |                       | <i>Klebsiella pneumoniae</i> strain FDAARGOS_442       | Canada            |
| 21 | p48896_6                            | <a href="#">CP024435.1</a> |                | 4 167           |                     | AbiEii (a)             |                                |                            |                       | <i>Klebsiella pneumoniae</i> strain DA48896            | Pakistan          |
| 22 | pKpn114                             | <a href="#">EU932690.1</a> |                | 4 211           |                     | AbiEii (a)             |                                |                            |                       | <i>Klebsiella pneumoniae</i> strain 0773               | China             |
| 23 | pKpn70742_3                         | <a href="#">CP023252.1</a> |                | 4 426           |                     | AbiEii (a)             |                                |                            |                       | <i>Klebsiella pneumoniae</i> strain CCUG 70742         | Sweden            |
| 24 | pKp_Goe_641-5                       | <a href="#">CP018739.1</a> |                | 3 541           |                     |                        |                                |                            |                       | <i>Klebsiella pneumoniae</i> strain Kp_Goe_121641      | Germany           |
| 25 | pKpvST101_7                         | <a href="#">CP031375.1</a> |                | 8 469           |                     |                        |                                |                            |                       | <i>Klebsiella pneumoniae</i> strain KpvST101_OXA-48    | United Kingdom    |
| 26 | pKO_JKo3_4                          | <a href="#">AP014955.1</a> |                | 3 897           |                     |                        |                                |                            |                       | <i>Klebsiella oxytoca</i>                              | Japon             |
| 27 | pKPN535a                            | <a href="#">MH595533.1</a> | InQ            | 14 873          |                     |                        |                                |                            |                       | <i>Klebsiella pneumoniae</i> strain KPN535             | Brazil            |
| 28 | FDAARGOS_436 plasmid unnamed3       | <a href="#">CP023908.1</a> |                | 4 000           |                     |                        |                                |                            |                       | <i>Klebsiella pneumoniae</i> strain FDAARGOS_436       | Canada            |
| 29 | p1_020046                           | <a href="#">CP028779.1</a> |                | 3 999           |                     |                        |                                |                            |                       | <i>Klebsiella pneumoniae</i> strain SCKP020046         | China             |
| 30 | pCAV1344-3741                       | <a href="#">CP011619.1</a> |                | 3 741           |                     |                        |                                |                            |                       | <i>Klebsiella pneumoniae</i> strain CAV1344            | USA               |
| 31 | pDA33140-9                          | <a href="#">CP029585.1</a> |                | 8 809           |                     | AbiEii (a)             |                                |                            |                       | <i>Klebsiella pneumoniae</i> strain DA33140            | Sweden            |
| 32 | AR_0158 plasmid tig00003569alt      | <a href="#">CP021700.1</a> |                | 8 364           |                     |                        |                                |                            |                       | <i>Klebsiella pneumoniae</i> strain AR_0158            | USA               |
| 33 | FDAARGOS_440 plasmid unnamed        | <a href="#">CP023920.1</a> |                | 4 619           |                     |                        |                                |                            |                       | <i>Klebsiella pneumoniae</i> strain FDAARGOS_440       | Canada            |
| 34 | KSB1_5D plasmid unnamed4            | <a href="#">CP024195.1</a> |                | 4 660           |                     |                        |                                |                            |                       | <i>Klebsiella pneumoniae</i> isolate KSB1_5D           | Australia         |
| 35 | pMRSN479404_4.7                     | <a href="#">CP024044.1</a> |                | 4 660           |                     |                        |                                |                            |                       | <i>Klebsiella pneumoniae</i> strain QS17-0029          | Thailand          |
| 36 | FDAARGOS_445 plasmid unnamed2       | <a href="#">CP024579.1</a> |                | 4 163           |                     |                        |                                |                            |                       | <i>Klebsiella pneumoniae</i> strain FDAARGOS_445       | Canada            |
| 37 | pCR14_5                             | <a href="#">CP015397.1</a> |                | 9 456           |                     |                        |                                |                            | <i>aac6'-lb-Tn3</i>   | <i>Klebsiella pneumoniae</i> strain CR14               | USA               |
| 38 | pKPN7                               | <a href="#">CP000652.1</a> |                | 3 478           |                     |                        |                                |                            |                       | <i>Klebsiella pneumoniae</i> MGH 78578                 | USA               |



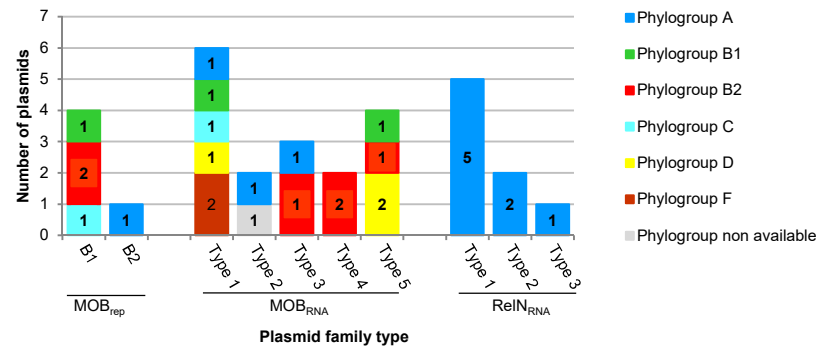

**Fig. S1.** Phylogenetic distribution of the parental *E. coli* strains of the 30 plasmids of our collection according to the family type of the plasmids. Phylogroups are shown according to the given colour code. The number of sequence types using the Pasteur Institut scheme in each phylogroup is indicated

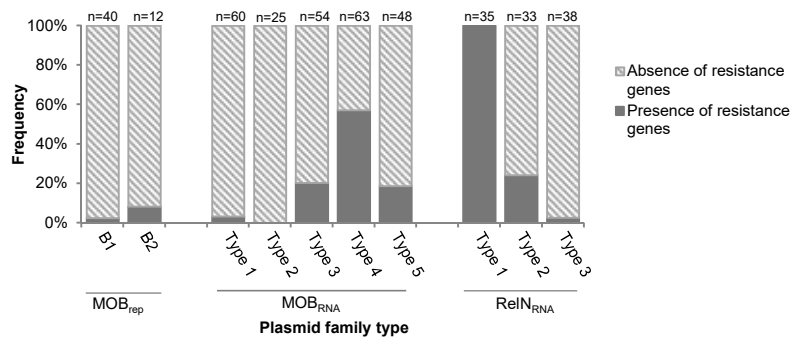

**Fig. S2.** Frequencies of the plasmids carrying at least one antibiotic resistance gene according to their family type. Numbers of plasmids in each of the families are indicated above the columns of the graph

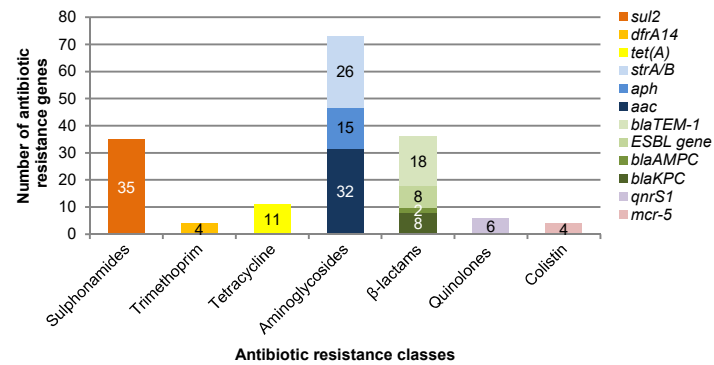

**Fig. S3.** Number of antibiotic resistance genes carried by the plasmids according to the antibiotic class they belong
